## 1 **Experimental assay of a fitness landscape on a macroevolutionary scale**

2  
3 Victoria O. Pokusaeva<sup>1+</sup>, Dinara R. Usmanova<sup>2+</sup>, Ekaterina V. Putintseva<sup>1+</sup>, Lorena Espinar<sup>3,4</sup>,  
4 Karen S. Sarkisyan<sup>1,5</sup>, Alexander S. Mishin<sup>5</sup>, Natalya S. Bogatyreva<sup>3,4,6</sup>, Dmitry N. Ivankov<sup>1,6</sup>,  
5 Arseniy V. Akopyan<sup>1</sup>, Sergey Ya. Avvakumov<sup>1</sup>, Inna S. Povolotskaya<sup>4</sup>, Guillaume J. Filion<sup>3,4</sup>,  
6 Lucas B. Carey<sup>4\*</sup>, Fyodor A. Kondrashov<sup>1\*</sup>

7  
8 <sup>1</sup>*Institute of Science and Technology Austria, Am Campus 1, 3400 Klosterneuburg, Austria.*

9 <sup>2</sup>*Department of Systems Biology, Columbia University, New York, 10032, NY, USA.*

10 <sup>3</sup>*Bioinformatics and Genomics Programme, Centre for Genomic Regulation (CRG), 88 Dr.*  
11 *Aiguader, 08003 Barcelona, Spain.*

12 <sup>4</sup>*Universitat Pompeu Fabra (UPF), 08003 Barcelona, Spain.*

13 <sup>5</sup>*Shemyakin-Ovchinnikov Institute of Bioorganic Chemistry, Miklukho-Maklaya 16/10, 117997*  
14 *Moscow, Russia.*

15 <sup>6</sup>*Laboratory of Protein Physics, Institute of Protein Research of the Russian Academy of*  
16 *Sciences, Pushchino, Moscow region, Russia*

17 <sup>+</sup>*Equal contribution*

18 <sup>\*</sup>*Authors for correspondence*

19  
20 **Characterizing the fitness landscape, a representation of fitness for a large set of genotypes,**  
21 **is key to understanding how genetic information is interpreted to create functional**  
22 **organisms. Here we determined the evolutionarily-relevant segment of the fitness**  
23 **landscape of His3, a gene coding for an enzyme in the histidine synthesis pathway, focusing**  
24 **on combinations of amino acid states found at orthologous sites of extant species. Just 15%**  
25 **of amino acids found in yeast His3 orthologues were always neutral while the impact on**  
26 **fitness of the remaining 85% depended on the genetic background. Furthermore, at 67%**  
27 **of sites, substitutions are under sign epistasis, having both strongly positive and negative**  
28 **effect in different genetic backgrounds. 46% of sites were under reciprocal sign epistasis.**  
29 **Sign epistasis affected few genotypes but involved interaction of multiple sites, shaping a**  
30 **rugged fitness landscape in which many of the shortest paths between highly fit genotypes**  
31 **are inaccessible.**

32  
33 Predicting function and fitness of organisms from their genotypes is the ultimate goal of  
34 many fields in biology, from medical genetics to systems biology to the study of evolution<sup>1-5</sup>.  
35 Among the conceptual frameworks for understanding the genotype to phenotype connection is  
36 the fitness landscape, which assigns a fitness (phenotype) to every possible genotype (sequence)  
37 of a gene or genome under consideration<sup>4,6</sup>. The recognition of the importance of the fitness  
38 landscape stimulated the development of a variety of theoretical approaches to its description,  
39 including its general shape and epistatic interactions between alleles, a key property which  
40 determines the complexity of the fitness landscape (see [ref. 4] and references within). Before  
41 the advent of next-generation sequencing, experimental assays of the fitness landscape were few  
42 and could not address the issue at the sequence level. Recently, large-scale experimental assays  
43 described the shape of the fitness landscape a few mutations away from a local fitness peak (see  
44 [ref. 7-10] and references within). Also, some assays involving a smaller number of genotypes  
45 considered combinations of mutations with established functional<sup>11-16</sup> or evolutionary<sup>17-22</sup>  
46 significance.

47 Empirical evidence of the nature of large-scale fitness landscapes mostly comes from the  
48 study of genotypes incorporating random mutations<sup>4,7-10</sup>, the majority of which are deleterious<sup>7-</sup>  
49 <sup>10,23</sup>. Thus, our present knowledge of fitness landscapes is primarily driven by the study of  
50 deleterious mutations and their interactions, although local adaptive trajectories have also been  
51 considered<sup>2,4,16,24-26</sup>. Deleterious mutations were found to engage in synergistic epistasis,

52 whereby the joint effect of multiple mutations was stronger than the sum of their individual  
53 effects<sup>4,7-10,16</sup>. Furthermore, sign epistasis among random mutations was mostly rare<sup>5,7-10,16,27</sup>,  
54 although some of these conclusions differ from study to study (e.g. see [4,27]).

55 Unfortunately, there are fundamental limitations to assaying the fitness landscape on a  
56 large or macroevolutionary level with random mutation libraries. The number of genotypes  
57 underlying the fitness landscape is the combinatorial set of all amino acids across the length of  
58 the protein<sup>4,6</sup>. For example, for the 220 amino acid protein coded by the His3 gene in  
59 *Saccharomyces cerevisiae*, the fitness landscape is a 220 dimensional genotype space with  $20^{220}$   
60 different possible sequences. Such immense spaces are both computationally and experimentally  
61 intractable. Fortunately, it may not be necessary to survey all genotypes to study the  
62 evolutionary-relevant section of the fitness landscape. Because the vast majority of mutations in  
63 protein sequences are deleterious<sup>23</sup>, a randomly sampled protein sequence is non-functional<sup>28,29</sup>.

64 Here we propose an evolutionary approach for assaying fitness landscapes on a  
65 macroevolutionary scale in a high-throughput manner that avoids the random sampling of mostly  
66 non-functional sequences. The functionally and evolutionarily relevant section of the fitness  
67 landscape can be represented by the combination of extant amino acid states, those found in  
68 extant species. This approach, applied previously on a limited scale<sup>17-22</sup> mitigates the problem of  
69 exploring a prohibitively large fitness landscape while highlighting the relationships between  
70 evolutionarily-relevant genotypes (**Fig. 1a**). Crucially, substitutions that have been fixed in  
71 evolution are fundamentally different from random mutations, the former are either neutral or  
72 beneficial in at least some genetic contexts and represent the driving force of molecular  
73 evolution, while the latter are mostly deleterious and are primarily relevant on a  
74 microevolutionary scale. Therefore, current empirical data do not shed much light on the impact  
75 of interactions between substitutions that fixed in the course of evolution by natural selection.  
76 Combinations of extant amino acid states allow one to assay a much wider functionally relevant  
77 area of the sequence space than approaches based on random mutagenesis of a single sequence  
78 (**Fig. 1b,c**).

### 79 **Estimating fitness of evolutionary-relevant genotypes**

80  
81 We studied His3, a gene coding for imidazoleglycerol-phosphate dehydratase (IGPD,  
82 His3p), an enzyme essential for histidine synthesis. In a multiple alignment of His3 orthologues  
83 from 21 yeast species we identified 686 extant amino acid states (**Supplementary Information**  
84 **1**), which were evenly distributed across the His3p structure (**Fig. 1d**). These 686 substitutions,  
85 which occurred over the course of ~400 million years of evolution<sup>30</sup> (**Fig. 1b,c**) correspond to  
86  $\sim 10^{83}$  sequences, even a tiny fraction of which would be too many to survey. Thus, we sectioned  
87 His3 into 12 independent segments such that the full combinatorial set of substitutions that have  
88 occurred in His3 during yeast evolution comprised 10,000-100,000 genotypes per segment (see  
89 **Methods** and **Supplementary Fig. 1a**). The 12 segments were of similar length, constrained by  
90 the molecular methods employed for library construction (see **Methods**), and covered a diverse  
91 range of secondary structures and functional elements (**Supplementary Fig. 1c**). For each of the  
92 12 segments of His3 we performed an independent experiment surveying its fitness landscape.  
93 For each segment we used degenerate oligonucleotides to construct genotypes consisting of  
94 combinations of amino acids present in extant His3 sequences, and determined the fitness  
95 conferred by these genotypes by expressing them in a  $\Delta his3$  strain of *S. cerevisiae* and  
96 measuring the rate of growth (**Supplementary Fig. 1b**). This way we assayed the fitness  
97 landscape of the genotype space that was traversed over the course of the last ~400 million years  
98 of evolution<sup>30</sup>.

99  
100 Across 11 experiments we measured fitness for a total of 4,018,105 genotypes (875,151  
101 unique amino acid sequences) with high accuracy. Of these, 422,717 consist solely of

102 combinations of extant amino acid states from His3 orthologues, while the remaining genotypes  
103 incorporate other amino acid substitutions (**Supplementary Table 1** and **Methods**). For one  
104 segment, 9, the accuracy of our experiment was low, and it was not used in cumulative analyses.  
105 For each segment we measured fitness for 60% - 99.8% of all possible genotypes from the  
106 combinatorial set of selected extant amino acid states found in 21 yeast species and a smaller  
107 fraction of combinations found across all domains of life (**Supplementary Table 1**),  
108 characterizing the evolutionary relevant fitness landscape (**Fig. 1b**). For segment 3 for instance,  
109 11 out of 17 amino acid sites had more than one extant amino acid state: L145=2, L147=2,  
110 Q148=3, K151=2, V152=2, D154=3, L164=3, E165=4, A168=2, E169=4, A170=4, with the full  
111 yeast combinatorial set consisting of  $2^2 \cdot 2^3 \cdot 2^2 \cdot 2^3 \cdot 3^4 \cdot 2^4 \cdot 4^4 = 55,296$  genotypes out of which  
112 we determined the fitness for 48,198, or 87% of the possible yeast extant states combinations in  
113 our library.

114  
115 A substantial proportion of combinations of extant amino acid states led to genotypes  
116 with low fitness (**Fig. 2**, **Fig. 3a,b**, **Supplementary Fig. 2**), an observation that takes into  
117 account the false discovery rate in our data (**Supplementary Table 1**). This observation could be  
118 explained by i) some extant amino acids having a universally deleterious effect, ii) some amino  
119 acid states exerting a negative effect on fitness because of intergenic interactions with other *S.*  
120 *cerevisiae* genes, or iii) by epistatic interactions between the extant amino acid states within  
121 His3<sup>31</sup>. We exclude the possibility that some extant amino acid states had a universally  
122 deleterious effect because no extant amino acid states were present only in unfit genetic  
123 backgrounds, genotypes conferring a fitness of zero (**Fig. 3c**). We exclude the possibility that  
124 some extant amino acid states disrupt intergenic interactions because the complete His3 coding  
125 sequences from extant species fully complemented a His3 deletion in *S. cerevisiae*  
126 (**Supplementary Fig. 3c**). Thus, the observed genotypes with low fitness can only be explained  
127 by epistatic interactions among extant amino acid states within the His3 gene in the same or  
128 different segments. Remarkably, 85% (330/389) of substitutions between extant amino acid  
129 states had substantially different effects on fitness in different backgrounds (**Fig. 3d**). By  
130 contrast, only 15% of amino acid substitutions that occurred in His3 evolution are truly neutral,  
131 in the sense that they do not exert strong influence on fitness in any genetic background. Three  
132 quarters of the universally neutral substitutions were observed in the disordered region of the  
133 protein (44/59). Thus, the His3 fitness landscape across the 11 segments with high accuracy was  
134 strongly influenced by epistasis on a macroevolutionary scale, i.e. the impact of an extant amino  
135 acid state on fitness often depends on the background in which it occurs<sup>31-34</sup>. An epistatic fitness  
136 landscape is rugged in the sense that evolving genotypes must avoid fitness valleys that emerge  
137 through deleterious combinations of amino acid states that may also be found in fit  
138 genotypes<sup>18,19,34-36</sup>. Characterizing the ruggedness and the mechanisms that determine the  
139 underlying epistasis becomes the primary challenge in understanding the fitness landscape of  
140 His3.

## 141 142 **Unidimensional epistasis of the His3 fitness landscape**

143  
144 The ruggedness of the fitness landscape can be characterized by different measures of  
145 complexity of the underlying epistatic interactions. In the simplest case, epistasis may be  
146 unidimensional, in the sense that the fitness landscape can be described as a function of an  
147 intermediate variable, the fitness potential<sup>37-39</sup>. The fitness landscape is a function from the space  
148 of genotypes to fitness. In analogy with a scalar field, we can characterize the ruggedness of this  
149 function with standard measures of complexity if genotypes are arranged in a linear space. The  
150 simplest case is that of a linear predictor called the fitness potential:  $p = c_1x_1 + c_2x_2 + \dots + c_nx_n$ ,  
151 where  $c_i$  is a coefficient and  $x_i$  is a binary variable that signifies the presence (1) or absence (0) of  
152 a given amino acid at a given position. By definition,  $e^p$  describes a non-epistatic fitness  
153 landscape because the effect of every substitution is multiplicative and it depends only on the

154 associated  $c$ . Any other function of  $p$  leads to epistasis. If the  $f(p)$  function is “simple”, meaning  
155 that it has a small number of local extremas, such as a bimodal function, the epistasis is called  
156 unidimensional<sup>39</sup>. The limitation of simplicity of  $f(p)$  is necessary because any function  $f_0(x_1, \dots,$   
157  $x_n)$  can be represented by a function  $f'(p)$  and choosing appropriate coefficients  $c_1, \dots, c_n$  in  $p$ .  
158 Thus, a simple  $f(p)$  leads to unidimensional epistasis because the entire genotype space can be  
159 reduced to a single dimension<sup>39</sup>.

160

161 To quantitatively determine how well fitness differences between genotypes can be  
162 explained by unidimensional epistasis we used a deep learning approach to estimate the  
163 coefficients  $c$  for each allele  $x$  in the fitness potential and determine the best unidimensional  
164 function of  $p$  that best approximated the fitness landscape. We used a dense neural network  
165 architecture composed of three layers. Each neuron in the architecture performed a linear  
166 transformation of its input and then applied a nonlinear (sigmoid) function. Hence, by using one  
167 neuron in the first layer we obtained a linear combination of the contributions of each amino acid  
168 state to fitness potential, which was then non-linearly mapped to fitness by the three layers of the  
169 neural network architecture (see **Methods; Supplementary Fig.4**). Ten segments were described  
170 by a threshold function in which organismal fitness remains constant with decreasing fitness  
171 potential and then is rapidly reduced to lethal after a certain threshold (**Fig. 4a**). The ability of  
172 the cliff-like threshold fitness function<sup>40</sup> to predict fitness from genotype varied between the  
173 His3 segments from near perfect ( $r^2=0.97$ ) in segment 7, to relatively poor ( $r^2=0.44$ ) in segment 5  
174 (**Supplementary Fig. 5**). Thus, while the fitness landscape of His3 is approximately  
175 unidimensional for some segments, it has a higher degree of complexity for others.

176

### 177 **Ruggedness and multidimensional epistasis of the His3 fitness landscape**

178

179 Ruggedness is a general property of fitness landscapes that quantifies the accessible paths  
180 of high fitness that connect fit genotypes<sup>41-43</sup>. A path between highly fit genotypes is inaccessible  
181 when one of the intermediate genotypes has low fitness<sup>6,20-22,41,44</sup> (e.g. for genotypes AB and ab,  
182 the intermediate are aB and Ab). Such instances also manifest in sign epistasis on the fitness  
183 landscape, that the same substitution may be beneficial or deleterious when occurring in a  
184 different genetic background<sup>44,45</sup>. To quantify the ruggedness of the His3 fitness landscape we  
185 identified instances of sign epistasis: substitutions between extant amino acid states that were  
186 strongly beneficial or strongly deleterious (change in fitness of  $> 0.4$  in absolute value)  
187 depending on the background in which they occurred<sup>44</sup>. Some of these instances may be due to  
188 misclassified fitness of very few genotypes. Therefore, we considered a pair of extant amino acid  
189 states to be under sign epistasis only when sign epistasis was observed in a statistically  
190 significant number of different genetic backgrounds (see **Methods**).

191

192 An example of sign epistasis is the substitution C141S in the second segment that had an  
193 opposite effect on fitness depending on amino acid at site 143 (I, V or T). The substitution I143T  
194 in turn exhibits sign epistasis depending on the amino acid at site 163 (F, I, V or L) (**Fig. 5a**).  
195 These epistatic interactions can be represented by a graph in which nodes represent a pair of  
196 extant amino acid states at a specific site and nodes are connected by edges if strong sign  
197 epistasis has been detected between them (C141S - I143T - I163F) (**Fig. 4b**). We found that 86  
198 out of 128 (67%) sites in our library exhibit sign epistasis and 46% (59/128) exhibit reciprocal  
199 sign epistasis. Most sites showed a sign epistatic interaction with multiple other sites (**Fig. 5c,d**)  
200 demonstrating that, although sign epistasis affects few genotypes, it leads to a fitness landscape  
201 that requires the interaction of multiple sites for proper characterization.

202

203 The complexity of interaction of sites can be estimated by using the graph of sign  
204 epistasis where vertices represent a substitution and edges connect vertices with sign epistasis  
205 between them. If only few substitutions display sign epistasis then such a graph would signify

206 that the fitness landscape is relatively smooth, alternatively, a highly-interconnected graph of  
207 such interactions signifies a more rugged landscape<sup>4,5,41-43</sup>. To measure the relative fitness  
208 complexity, we used the maximum clique size of a graph, which approximates the maximum  
209 number of simultaneously interacting substitutions. In our data, this measure ranged from two to  
210 seven depending on the segment (**Supplementary Fig. 6**). The ruggedness of the fitness  
211 landscape of His3 is high for most segments, such as segment 5, where it is necessary to consider  
212 the simultaneous interaction of at least seven sites to accurately predict the fitness of genotypes  
213 consisting of extant amino acid states at these sites<sup>38,40</sup>.

214  
215 Sign epistasis can appear when fitness is described by a unidimensional function of the  
216 fitness potential, for example, when the fitness landscape is a unimodal function with an  
217 optimum in an intermediate range of the fitness potential<sup>41,45</sup>. However, sign epistasis may also  
218 be a sign of multidimensional epistasis, when a unidimensional function of the fitness potential  
219 cannot fully describe genotype fitness<sup>39</sup>. Many genotypes were predicted poorly by a  
220 unidimensional function of the fitness potential (**Supplementary Fig. 5a**). Two lines of evidence  
221 suggest that such genotypes reveal the presence of multidimensional epistasis. First, genotypes  
222 with a higher number of substitutions influenced by sign epistasis were less well-predicted by a  
223 unidimensional fitness function (**Fig. 4c and Supplementary Fig. 7b**). Second, we explain a  
224 larger fraction of genotypes by using a more complex neural network architecture  
225 accommodating multiple fitness potentials instead of one. We found that increasing the amount  
226 of neurons in the first layer of the neural network architecture, which is equivalent to increasing  
227 the number of independent fitness potentials, gradually improves the prediction power of the  
228 obtained models for most of the segments (**Fig. 4d**). Thus, adding dimensions to the function of  
229 fitness potential increases the prediction power of the model. For example, for a two-  
230 dimensional case fitness was described by  $f_i(p_1, p_2)$  with  $p_1 = a_1x_1 + a_2x_2 \dots a_nx_n$  and  $p_2 = b_1x_1 +$   
231  $b_2x_2 \dots b_nx_n$ . For several His3 segments, a fitness function with multiple underlying fitness  
232 potentials described the fitness landscape more accurately than a simple unidimensional function  
233 of a single fitness potential (**Supplementary Fig. 7a**). For instance, for these segments, fitness  
234 function of two fitness potentials described the shape with a higher degree of accuracy than a  
235 function of a single fitness potential (**Fig. 4d,e**). By contrast, epistasis in segment 7 is entirely  
236 unidimensional (**Fig. 4d,e and Supplementary Information 2**); we do not see any improvement  
237 in the model's predictive power when adding extra dimensions.

### 238 239 **Evolutionary trajectories on the His3 fitness landscape**

240  
241 On a smooth fitness landscape, evolution can proceed along any of the evolutionary paths  
242 connecting two fit genotypes, as none of the intermediate genotypes confer low fitness (see Box  
243 2 in [46]). Alternatively, the fitness landscape is rugged when it contains non-connected fitness  
244 peaks, such that there are no viable paths between some pairs of genotypes that confer high  
245 fitness<sup>4,5</sup>. In other words, the presence of deleterious intermediate genotypes between highly fit  
246 ones leads to inaccessibility of some evolutionary trajectories between extant or ancestral  
247 sequences<sup>6,20-22,44</sup>. The simplest explanation for the substantial ruggedness of the landscape  
248 observed in many of the His3 segments lies in the unidimensional threshold fitness function  
249 (**Fig. 6a**). On a threshold function a combinations of substitutions, all of which are neutral in  
250 some genetic backgrounds, can take a genotype beyond the fitness threshold through their  
251 additive effect on fitness potential, making some genotypes inaccessible for evolution (**Fig. 6a**).  
252 Between any two fit genotypes, the fraction of intermediate genotypes that are unfit depends on  
253 the fitness potential of the two parental genotypes (**Fig. 6b**). Evolution between two fit  
254 genotypes with high fitness potential can proceed unhindered because all intermediate genotypes  
255 also have high fitness potential and, consequently, high fitness. Conversely, when both fit  
256 genotypes are located close to the threshold, many of the intermediate genotypes between them  
257 have low fitness and many evolutionary paths between them are inaccessible (**Fig. 6c**). Thus, the

258 cliff-like threshold fitness function is the major determinant of the observation that not all paths  
259 between two fit genotypes are accessible to evolution (**Fig. 6b**). We find that unfit intermediate  
260 genotypes are in genetic proximity with each other and are on a limited number of paths; the  
261 fraction of inaccessible paths is smaller than if the same number of unfit genotypes were  
262 distributed randomly in genotype space (**Fig. 6d,e**).

263

264 The effect of synergistic epistasis dominates the His3 fitness landscape, affecting over  
265 85% of amino acid substitutions from our library that occurred in His3 evolution. This  
266 synergistic epistasis may reflect the free energy of the protein<sup>10,47,48</sup>, as evidenced by a  
267 correlation between the fitness potential and the impact of substitutions on the free energy of  
268 His3p (**Supplementary Fig. 8**). Similarly, instances of sign epistasis may also be explained by  
269 changes in protein stability; for example, in the 143T background C141S increased fitness and  
270 also had a positive effect on stability (**Fig. 5b**). Consistent with protein stability contributing to  
271 the observed sign epistasis we find that sites that exhibited reciprocal sign epistasis are close  
272 together in the His3p structure (**Supplementary Fig. 8**). However, an additive contribution to  
273 free energy can lead only to a unidimensional fitness function<sup>47</sup>, indicating that other non-  
274 additive mechanisms, such as catalytic activity or inter-subunit interactions, or a non-additive  
275 model of free energy, must be responsible for the multidimensionality of the His3 fitness  
276 landscape.

277

### 278 **Inference of inter-segmental epistatic interactions in the His3 gene sequence**

279

280 Epistasis may be caused by interaction among positions within a segment (intra-  
281 segmental epistasis) or by interaction of the segment with the rest of the *S. cerevisiae* His3  
282 sequence (inter-segmental epistasis). The contribution of inter- versus intra-segmental  
283 interactions can be decoupled. Given two fit genotypes (*e.g.* ABC & abc in one His3 segment),  
284 any unfit intermediate states (*e.g.* aBc in the same His3 segment) must be due to intra-segmental  
285 epistasis because the rest of the protein remains constant. For each segment we took as a  
286 measurement of intra-segmental epistasis all pairs of fit genotypes and calculated the proportion  
287 of unfit intermediate genotypes as a function of the Hamming distance between the two fit  
288 genotypes. We then compared this proportion with the total proportion of all unfit genotypes as a  
289 function of Hamming distance from *S. cerevisiae*, a measurement that includes both inter- and  
290 intra-segmental epistasis. We found three times more inter-segmental than intra-segmental  
291 epistasis (**Supplementary Fig. 9**), likely because a single segment provides a much smaller  
292 target space for interactions than the entire His3 protein. The proportion of sites under epistatic  
293 interactions increased exponentially with Hamming distance (**Supplementary Fig. 9**), analogous  
294 to Orr's snowball, the accumulation of genetic incompatibilities in the course of speciation<sup>31,49</sup>.

295

### 296 **Conclusions**

297

298 The concept of the fitness landscape introduced by Sewall Wright (Figures 1 and 2 in [6])  
299 is an indispensable tool for understanding multiple biological phenomena<sup>1-5</sup>. Experimental high-  
300 throughput assays of random mutations have begun to unravel some local properties of fitness  
301 landscapes<sup>4</sup>. Here, we described a fitness landscape on a macroevolutionary scale by focusing on  
302 amino acid states that have been put through the sieve of natural selection. We found that only  
303 15% of substitutions that fixed in the evolution of His3 are universally neutral. For the remaining  
304 85%, substitutions from His3 evolution had a profound influence on each other's effect on  
305 fitness, providing an experimental confirmation that epistasis is one of the defining features of  
306 molecular evolution<sup>33</sup>. Substitutions that occur in evolution have properties vastly different from  
307 those of random mutations, which are mostly deleterious<sup>23</sup>. Therefore, the way in which  
308 combinations of extant amino acid states affect fitness may also be different from that of  
309 combinations of random mutations. Unexpectedly, we found that the interaction of extant amino

310 acid states was dominated by synergistic epistasis in a manner similar to that previously found  
311 for random mutations<sup>7-10,16</sup>. However, the accumulation of random mutations leads to low fitness  
312 much faster than the accumulation of extant amino acid states (compare Figure 2 from [16] and  
313 Figure 3b from [10] to **Fig. 2a**).

314

315 The experimental data showing that 85% of amino acid states found in extant species  
316 confer low fitness in a different genetic background lends strong support to the notion that  
317 epistasis is a key factor in protein evolution<sup>31,33</sup>. We showed that the fitness landscape of several  
318 segments of the His3 gene cannot be reduced to a single unidimensional forms of epistasis, with  
319 a function of multiple fitness potentials providing a more accurate description of the fitness  
320 landscape. By contrast, large-scale fitness landscapes incorporating multiple random mutations  
321 away from the wildtype sequence in a constant test environment have not displayed evidence of  
322 multidimensional epistasis<sup>8-10,16</sup>; however, it appears to be a more prevalent factor among  
323 substitutions that have been subject to positive selection<sup>12-16,18-22,34-36</sup>. We also found that up to  
324 67% of sites with an extant amino acid state were influenced by sign epistasis, resulting in a  
325 rugged fitness landscape and a limited number of fitness ridges connecting extant sequences for  
326 most His3 segments. Overall, the evolutionary-relevant section of the His3 fitness landscape is  
327 best described as a fitness ridge, with the crest of the ridge defined by a fitness potential. In some  
328 cases, the crest is multidimensional requiring several independent underlying fitness potentials.  
329 Evolution can proceed unhindered along the crest (**Fig. 6a,c**), however, pathway availability  
330 declines rapidly when evolution proceeds close to the edge of the fitness ridge.

331

### 332 **Acknowledgements**

333 We thank Ben Lehner for a thorough study of the concept behind our experiments and Julia  
334 Domingo for technical assistance with preliminary analysis of our data. Jochen Hecht of the  
335 CRG Genomics Unit and Svetlana Belogorodtdeva and Roman Belogorodtsev provided  
336 technical assistance. The work was supported by HHMI International Early Career Scientist  
337 Program (55007424), the MINECO (BFU2012-31329, BFU2012-37168, BFU2015-68351-P and  
338 BFU2015-68723-P), Spanish Ministry of Economy and Competitiveness Centro de Excelencia  
339 Severo Ochoa 2013-2017 grant (SEV-2012-0208), the Unidad de Excelencia María de Maeztu  
340 funded by the MINECO (MDM-2014-0370), Secretaria d'Universitats i Recerca del Departament  
341 d'Economia i Coneixement de la Generalitat AGAUR program (2014 SGR 0974), the CERCA  
342 Programme of the Generalitat de Catalunya, Russian Foundation for Basic Research grant (18-  
343 04-01173), the European Union's Horizon 2020 research and innovation programme under the  
344 Marie Skłodowska-Curie programme (665385) and the European Research Council under the  
345 European Union's Seventh Framework Programme (FP7/2007-2013, ERC grant agreement  
346 335980\_EinME and Synergy Grant 609989).

347

348 **Author contribution.** ISP, LBC and FAK conceived the general approach of the study. FAK,  
349 LBC, VOP, LE and GJF participated in detailed experimental design. VOP, DRU and EVP  
350 spearheaded the experiment, data analysis and main data interpretation, respectively. LE  
351 performed a large fraction of the experimental work. AVA and SYaA participated in working on  
352 dimensionality. KSS, ASM, NSB, DNI and GJF participated in data analysis. LBC and FAK  
353 wrote the draft.

354

### 355 **Methods**

356

#### 357 **Data access**

358 The raw and processed data have been submitted to the NCBI Gene Expression Omnibus  
359 (GEO;<http://www.ncbi.nlm.nih.gov/geo/>) under accession number GSE99990. A virtual machine  
360 containing a running version of the data processing pipeline is available as a Docker image

361 <https://hub.docker.com/r/guil1aume/epi/>. The scripts to reproduce the figures are on Github at  
362 <https://github.com/Lcarey/HIS3InterspeciesEpistasis>.

363

### 364 **Study design**

365 The His3 gene was selected for three principal reasons, it is short, conditionally essential  
366 and was not known to be involved in protein-protein interactions. Studying  $20^{220}$  variants of His3  
367 is impossible, thus, we have chosen an approach to survey the fitness landscape in a manner that  
368 would elucidate the area most relevant to His3 evolution while managing the technical  
369 limitations of our experimental design. We considered amino acid states found in extant species,  
370 focusing on yeast species, which translated into a full combinatorial set of  $\sim 10^{83}$  unique  
371 genotypes. Technically it is feasible to measure fitness of up to 100,000 unique genotypes in a  
372 single growth experiment. Therefore, we split the His3 gene into 12 independent segments such  
373 that the full combinatorial set of extant amino acid states from 21 yeast species in each segment  
374 was 10,000 – 100,000 genotypes. We then considered the combinatorial library for each segment  
375 in an independent growth experiment, which allowed us to study a tractable section of the  
376 sequence space while considering trajectories across a vast part of the space connecting extant  
377 species (**Fig. 1a**). We constructed these combinations in 12 plasmid libraries and transformed  
378 them into a haploid His3 knockout *S. cerevisiae* strain. Growth rate (fitness) of yeast carrying  
379 different mutations in His3 was measured using serial batch culture in the absence of histidine.

380 We split the His3 gene sequence into segments in a manner agnostic to the structure of  
381 the His3 protein (**Supplementary Fig. 1a**). For technical reasons, a segment consisted of two  
382 variable regions with a constant region between them (**Supplementary Fig. 1b**). All growth  
383 experiments were performed independently for each segment, with the exception of one  
384 experiment on a limited group of genotypes from each segment which was done for the  
385 normalization of fitness values across different segments (**Supplementary Fig. 3**).

386 As a control, we measured the rate of growth of *S. cerevisiae* whose entire His3 gene  
387 sequence came from another distant species. We found that the replacement of an entire gene  
388 sequence of His3 leads to wild-type rates of growth of *S. cerevisiae* even when the His3  
389 sequence comes from very distant yeasts, as far as *S. pombe* (**Supplementary Fig. 3**). Therefore,  
390 His3 appears to be an independent unit of the fitness landscape and is a good model for the study  
391 of fitness landscapes of an isolated gene.

392

### 393 **Measuring fitness**

#### 394 *Plasmid construction*

395 The His3 open reading frame of *S. cerevisiae* was PCR amplified with its regulatory  
396 region from 622 base pairs (bp) upstream of the open reading frame (ORF) to 237 bp  
397 downstream of the ORF, using primers 126 and 127 (see **Supplementary Table 1**) from the  
398 wild-type prototroph strain FY4. The PCR product was cloned into vector pRS416 using Gibson  
399 assembly (NEB, E2611S). The His3 orthologues from other species were amplified from  
400 genomic DNA using designed primers (**Supplementary Table 1**) and were cloned into the  
401 vector pRS416\_his3, replacing the ORF of *S. cerevisiae* by Gibson assembly (NEB, E2611S).  
402 Since the His3 orthologue from *A. nidulans* contains an intron, the whole open reading frame  
403 was initially cloned into the vector, and the intron was later removed by PCR-amplifying the  
404 whole plasmid without this sequence, followed by recircularization.

405

#### 406 *Genomic DNA extraction*

407 Genomic DNA from fungi (*Saccharomyces cerevisiae*, *Saccharomyces bayanus*, *Candida*  
408 *glabrata*, *Saccharomyces castellii*, *Kluyveromyces lactis*, *Eremothecium gossypii*, *Debaryomyces*  
409 *hansenii*, *Lodderomyces longosporus*, *Aspergillus nidulans*, *Schizosaccharomyces pombe*,  
410 *Candida guilliermondii*, *Saccharomyces kluyveri*, *Kluyveromyces waltii*) was extracted using  
411 MasterPure™ Yeast DNA Purification Kit according to the manufacturer's instructions  
412 (Epicentre, MPY80200).



413

#### 414 *Mutant library construction*

415 Twelve independent mutant libraries, each for different regions of His3 (**Supplementary**  
416 **Table 1**), were generated based on the results of multiple alignment of His3 orthologues. The  
417 alignment was built using the ClustalW alignment feature of the MEGA 6.0 software package<sup>50</sup>  
418 and user-corrected.

419 Mutant libraries were constructed by fusion-PCR, leaving two variable regions separated  
420 by a constant region. For each library, two contiguous fragments of His3 were amplified  
421 independently, using 1 µg of *S. cerevisiae* (strain FY4) genomic DNA in separate Phusion  
422 polymerase reaction mixes (Thermo Fisher Scientific, F530S) in GC buffer. For each PCR, one  
423 of the primers was a degenerate oligonucleotide with a constant part at the 5' end required for  
424 the fusion-PCR; the other primer was either 126 or 127. The degenerate primer approach led to  
425 the integration of non-extant amino acid sequences due to the redundancy of the genetic code.  
426 Consider the amino acid Phe in *S. cerevisiae* coded by the codon TTT. When incorporating an  
427 extant orthologous state Trp (TGG) two independent T → G nucleotide mutations will be  
428 incorporated creating the codons TTG (Leu) and TGT (Cys). If these two amino acids were not  
429 found in other species then they would be non-extant. The cycling conditions for the PCR were  
430 98°C for 30 s; 98°C for 20 s, 60 °C for 30s and 72°C for 1 min (25 cycles); and 72°C for 5 min.  
431 The products were column-purified (QIAGEN, QIAquick PCR purification kit, 28104), eluted in  
432 50 µl and mixed in equimolar proportion. The fusion-PCR was carried out by diluting 10 µl of  
433 the mix to 25 µL of standard Phusion polymerase reaction mix in GC buffer. The cycling  
434 conditions of the fusion-PCR were 98°C for 30 s; 98°C for 30 s, 60°C for 2 min and 72°C for 1  
435 min (25 cycles); and 72°C for 5 min. The product of fusion was purified from agarose gel  
436 (Qiagen, MinElute Gel Extraction Kit, 28604) and eluted in 10 µl of water. 10 µl of the product  
437 was used as a template for additional 5 cycles of PCR reaction in Phusion polymerase reaction  
438 mix (Thermo Fisher Scientific, F530S) in GC buffer, using primers 126 and 127. The cycling  
439 conditions were as follows: 98°C for 30 s; 98°C for 20 s, 60°C for 30 s and 72°C for 1 min (5  
440 cycles); and 72°C for 5 min. The product was column-purified (QIAGEN, QIAquick PCR  
441 purification kit, 28104), and used as an insert for Gibson assembly.

442 To create a library of His3 mutants, pRS416 plasmid was amplified using primers 128  
443 and 129. The insert was cloned into the vector using Gibson assembly (NEB, E2611S). Ligated  
444 products (200 - 300 ng/µL) were desalted by drop dialysis using 13 mm diameter, Type-VS  
445 Millipore membrane (Merck Millipore, VSWP01300). 20 µL ElectroMAX DH10B competent  
446 cells (Invitrogen, 18290015) were electroporated with 3 µL ligated products. 0.01% of the  
447 electroporated bacteria were plated on ampicillin-containing medium in order to estimate the  
448 complexity of the library; the remaining culture was grown overnight in 100 ml of liquid  
449 medium, and the plasmid was extracted the next day. For each library, the maximum number of  
450 protein sequences that can be generated was computed. Libraries were generated until to total  
451 complexity reached at least 3 times this value.

452

#### 453 *Yeast transformation and yeast library generation*

454 For each segment, yeast strain LBCY47 (*his3::KanMXleu2Δ0 met15Δ0 ura3Δ0*, derived  
455 from BY4741) was transformed with 50 µg of pRS416\_His3 mutant library using lithium acetate  
456 transformation and plated onto glucose synthetic complete dropout plates lacking uracil. After 40  
457 hours' growth at 30°C, approximately 0.5 million yeast colonies were scraped off the plates,  
458 mixed together and washed 2 times with 100 ml of PBS.

459

#### 460 *Bulk competition*

461  $4 \times 10^9$  cells were inoculated into 500 ml of glucose synthetic complete dropout medium  
462 lacking uracil with 200 mg/L of G418, and grown at 30°C at 220 RPM for 6-8 h in order to  
463 eliminate clones with low fitness irrespective of histidine biosynthesis. Cells were later pelleted  
464 and washed with 50 ml of PBS. Approximately  $10^{10}$  cells were inoculated into 1 L of synthetic

465 complete dropout medium lacking histidine, and grown at 30°C at 220 RPM for 168 h with 12 h  
466 between bottlenecks:  $\sim 10^{10}$  cells were transferred into fresh medium  $\sim 10^8$  cells from the culture  
467 were kept as sample for the given time point. Bulk competition for each library of mutants was  
468 done in two replicates to account for biological variability.

469

#### 470 *NGS library preparation*

471 The relative abundance of yeast mutants was measured in 3 samples: 1) the initial  
472 population before selection was applied (t0), 2) the population after 12 h of growth in the  
473 selective medium (t1), and 3) the final population after 168 h of growth in the selective medium  
474 (t14). In order to extract plasmid DNA,  $5 \times 10^9$  cells from each sample were incubated in 300  $\mu$ L  
475 of zymolyase buffer (1 M sorbitol, 0.1 M sodium acetate, 60mM EDTA (pH 7.0), 2 mg/ml  
476 zymolyase, 1% 2-Mercaptoethanol) at 37°C for 3 h. The plasmid DNA was purified from the  
477 obtained spheroplasts using QIAprep Spin Miniprep Kit (QIAGEN, 27104) according to the  
478 manufacturer's protocol. The obtained DNA was used as a template in a 25  $\mu$ L of Q5 DNA  
479 polymerase reaction mix (NEB, M0491S), using staggered primers for demultiplexing in the  
480 following cycling conditions: 98°C for 30s; 98°C for 10s, 60°C for 30s and 72°C for 30s (18  
481 cycles); and 72°C for 2 min. PCR products were purified using Agencourt AM Pure XP beads  
482 (Beckman Coulter, A63880), and eluted in 40  $\mu$ L of TE buffer (pH 8.0). DNA extraction and  
483 PCR-amplification were repeated twice for every sample to account for the technical variability.

484

485 NGS libraries were prepared from 100 ng of the purified DNA amplicons using Ovation Rapid  
486 DR System (Nugen, 0319-32) according to manufacturer's instructions. Each library was  
487 visualized on a Bioanalyzer (Agilent Technologies) and quantified by qPCR with a Kapa Library  
488 Quantification Kit (Kapa Biosystems, KK4835). Twelve samples were pooled together  
489 (accounting for two biological replicates, two technical replicates and three time points) at the  
490 final concentration of 4 nM, and sequenced in the same lane. Samples were sequenced as 125-bp  
491 paired-end reads on a HiSeq2500 sequencer (Illumina) with v4 sequencing chemistry.

492

#### 493 *Yeast growth assay*

494 Mutant strains were grown overnight in complete dropout medium lacking uracil. The  
495 cultures were diluted to 0.05 OD 600 nm, and grown for 5 h in the same medium. 6  $\mu$ L of each  
496 culture were transferred into 96-well plates in 125  $\mu$ L of complete dropout medium lacking  
497 histidine. Growth of the strains was monitored by measuring OD 600 nm every 10 min using  
498 Tecan Infinite M1000 PRO microplate reader equipped with an integrated Stacker module.

499

500 The growth rate of individual curves was measured as the inverse of the time to grow  
501 from OD = 0.135 =  $\exp(-2)$  to OD = 0.368 =  $\exp(-1)$ . If the curve did not reach 0.368, the growth  
502 was set to 0. Curves that crossed 0.135 or 0.368 were excluded. The growth rate of a clone was  
503 measured as the median of 6 independent growth experiments. We excluded from the analysis  
504 clones with discordance between growth in solid and liquid medium, clones that could not be  
505 sequenced or that showed evidence of contamination by sequencing, and clones such that the  
506 Kullback-Leibler divergence of their read counts compared to all synonymous clones was greater  
507 than 0.22. The later criterion ensured that the selected clones were not outliers compared to other  
508 variants encoding the same protein.

509

#### 510 *Growth rates of isolated strains*

511 We isolated 197 strains from all segment libraries of extant amino acid combinations (9-  
512 26 strain per segment) and used Sanger sequencing to determine the sequence. For each strain  
513 we performed 6 repeats of growth assay and calculated the average growth rate. Fitness values  
514 from competition and growth rates are highly correlated ( $r=0.82$   $p=10^{-48}$ ). Correlation was  
515 significant and greater than 0.6 for all segments except S9, where all selected genotypes  
516 appeared to be neutral (**Supplementary Fig. 3**).

517

### 518 ***Initial data filtering***

519 The individual sequences of the variants were recovered from pair-end reads with the  
520 following steps: the constant region between the two variable regions was identified by inexact  
521 matching allowing up to 20% errors using the Seeq library version 1.1.2  
522 (<https://github.com/ezorita/seeq>). The reads are not oriented because the Illumina sequencing  
523 adapters were added by ligation, so the constant regions were searched on both reads. Forward  
524 and reverse reads were swapped when a match was found on the reverse read. This ensured that  
525 all of the sequences are in the same orientation. For multiplexing purposes, the sample identity  
526 was encoded in the left and right primers used to PCR-amplify the variants. To demultiplex the  
527 reads, we used inexact matching with the candidate primers, allowing up to 20% errors. This  
528 approach was faster and less error-prone than using FLASH<sup>51</sup>. To merge the reads, the sequence  
529 of the reverse reads was reverse complemented and the constant region was searched by inexact  
530 matching allowing up to 20% errors. The position of the constant part in each read indicated how  
531 they must be stitched together. In the region of overlap, the consensus sequence was determined  
532 by picking the nucleotide with highest quality as indicated in the quality line of the fastq files. If  
533 'N' persisted in the final sequence, the reads were discarded. The PCR primers were trimmed so  
534 that all the sequences of the same competition would start and end at the same location.

535 Reads that did not have the constant region, that could not be oriented or that could not  
536 be demultiplexed were discarded. The remaining errors in the reads were corrected by sequence  
537 clustering. We used starcode version 1.0 [ref. 52] with default parameters and allowing up to two  
538 errors. The corrected reads were translated using the genetic code. Variants encoding the same  
539 proteins were not merged; they were kept separate for downstream analyses. A running Docker  
540 virtual machine with commented scripts to replay the whole the process is available for  
541 download at <https://hub.docker.com/r/guil1aume/epi/>.

542

### 543 ***DNA sequence variant frequency calculation and data filtering***

544 The total number of reads for 12 segments, 3 time points and 4 replicas are shown in  
545 **Supplementary Table 1**. Genotypes frequencies are defined as the number of reads for a given  
546 genotype divided by the total number of reads in that replicate. Mean frequency was calculated  
547 over 4 replicas to be used in further analysis. However, to eliminate influence of outliers the  
548 median was taken instead of mean if absolute difference between mean and median was greater  
549 than the median value. Only genotypes present in both technical replicas of both biological  
550 replicas with at least ten reads (summed across all time points) in each of them were kept.

551

### 552 ***Noise estimation***

553 The major factors causing noise in genotype frequency measurements are sampling  
554 errors, PCR amplification errors and genetic drift during the competition. For all of these factors,  
555 the amount of error depends on the genotype frequency. Therefore, we estimated measurement  
556 errors as the function of genotype frequency.

557 For a given segment, time point and a pair of biological or technical replicas for each  
558 genotype we calculated the mean frequency and the squared difference of frequencies from these  
559 two replicas. We sorted genotypes by mean frequency and grouped them such that each bin  
560 contains 5000 genotypes. We calculated the average frequency and the average squared  
561 difference in each bin. Additionally, squared error for frequency 0 was set equal to  $\frac{1}{2} \cdot$   
562  $\left( \left( \frac{0.5}{N_i} \right)^2 + \left( \frac{0.5}{N_j} \right)^2 \right)$ , where  $N_i$  and  $N_j$  are total read numbers in replicas  $i$  and  $j$ . Finally, by linear  
563 interpolation we obtained dependencies of squared differences as a function of frequency,  $s_{ij}^2(f)$ ,  
564 where  $i$  and  $j$  are different replicas.

565 Using squared differences from pairwise comparison of replicas we can estimate variance  
566 of mean frequency over four replicas. Let numerate replicas 1, 2, 3, 4 where 1, 2 are technical

567 replicas of the first biological repeat and 3, 4 are the technical replicas of the second biological  
 568 repeat. Errors coming from the competition (e.g.: genetic drift) are shared for replicas 1, 2 and  
 569 for replicas 3, 4. Let's call them  $\Delta f_{b_1}$  and  $\Delta f_{b_2}$  and their variances  $\sigma_{b_1}^2$  and  $\sigma_{b_2}^2$  respectively.  
 570 Technical errors of sampling from the population and from PCR are unique for each replica.  
 571 Let's call them  $\Delta f_{t_i}$ ,  $i = 1..4$  and their variances  $\sigma_{t_i}^2$ ,  $i = 1..4$  respectively. All variances are  
 572 function of frequency and writing  $\sigma_{x_i}^2$  we assume  $\sigma_{x_i}^2(f)$ .

573 In the introduced notations the mean frequency over 4 replicas is:

$$f = \frac{1}{4} \cdot (f_1 + f_2 + f_3 + f_4) =$$

$$\frac{1}{4} \cdot \left( (f^* + \Delta f_{b_1} + \Delta f_{t_1}) + (f^* + \Delta f_{b_1} + \Delta f_{t_2}) + (f^* + \Delta f_{b_2} + \Delta f_{t_3}) + (f^* + \Delta f_{b_2} + \Delta f_{t_4}) \right) =$$

$$f^* + \frac{1}{2} \cdot (\Delta f_{b_1} + \Delta f_{b_2}) + \frac{1}{4} \cdot (\Delta f_{t_1} + \Delta f_{t_2} + \Delta f_{t_3} + \Delta f_{t_4}),$$

574 where  $f^*$  is the true frequency. Applying basic properties of variance the variance of mean  
 575 frequency:

$$\sigma^2 = \frac{1}{4} \cdot (\sigma_{b_1}^2 + \sigma_{b_2}^2) + \frac{1}{16} \cdot (\sigma_{t_1}^2 + \sigma_{t_2}^2 + \sigma_{t_3}^2 + \sigma_{t_4}^2)$$

576 To estimate  $\sigma_{b_1}^2, \sigma_{b_2}^2, \sigma_{t_1}^2, \sigma_{t_2}^2, \sigma_{t_3}^2, \sigma_{t_4}^2$  we used squared differences from pairwise comparison  
 577 of replicas calculated above  $s_{12}^2, s_{13}^2, s_{14}^2, s_{23}^2, s_{24}^2, s_{34}^2$ :

$$\mathbb{E}[s_{12}^2] = \mathbb{E}[(\Delta f_{t_1} - \Delta f_{t_2})^2] = \sigma_{t_1}^2 + \sigma_{t_2}^2$$

$$\mathbb{E}[s_{13}^2] = \mathbb{E}[(\Delta f_{b_1} + \Delta f_{t_1} - \Delta f_{b_2} - \Delta f_{t_3})^2] = \sigma_{b_1}^2 + \sigma_{t_1}^2 + \sigma_{b_2}^2 + \sigma_{t_3}^2$$

$$\mathbb{E}[s_{14}^2] = \mathbb{E}[(\Delta f_{b_1} + \Delta f_{t_1} - \Delta f_{b_2} - \Delta f_{t_4})^2] = \sigma_{b_1}^2 + \sigma_{t_1}^2 + \sigma_{b_2}^2 + \sigma_{t_4}^2$$

$$\mathbb{E}[s_{23}^2] = \mathbb{E}[(\Delta f_{b_1} + \Delta f_{t_2} - \Delta f_{b_2} - \Delta f_{t_3})^2] = \sigma_{b_1}^2 + \sigma_{t_2}^2 + \sigma_{b_2}^2 + \sigma_{t_3}^2$$

$$\mathbb{E}[s_{24}^2] = \mathbb{E}[(\Delta f_{b_1} + \Delta f_{t_2} - \Delta f_{b_2} - \Delta f_{t_4})^2] = \sigma_{b_1}^2 + \sigma_{t_2}^2 + \sigma_{b_2}^2 + \sigma_{t_4}^2$$

$$\mathbb{E}[s_{34}^2] = \mathbb{E}[(\Delta f_{t_3} - \Delta f_{t_4})^2] = \sigma_{t_3}^2 + \sigma_{t_4}^2$$

581 Therefore, the variance of mean frequency  $f$  can be found as:

$$\sigma^2 = \frac{1}{16} \cdot \left( (s_{13}^2 + s_{14}^2 + s_{23}^2 + s_{24}^2) - (s_{12}^2 + s_{34}^2) \right)$$

582 Recalling that variance and squared differences are a function of frequency:

$$\sigma^2(f) = \frac{1}{16} \cdot \left( (s_{13}^2(f) + s_{14}^2(f) + s_{23}^2(f) + s_{24}^2(f)) - (s_{12}^2(f) + s_{34}^2(f)) \right)$$

583 For each segment and time point we calculated the numerical function  $\sigma^2(f)$ . Then for each  
 584 genotype having mean frequency  $f_x$  we estimated its variance as  $\sigma^2(f_x)$

### 585 **Merging amino acid genotypes**

587 We merged nucleotide genotypes that corresponded to the same amino acid sequence and  
 588 summed their frequencies and variances. We filtered out all genotypes  $x$  which had any of  
 589 following patterns:

590  $f_x^{t_0} = 0, f_x^{t_1} = 0, f_x^{t_2} > 0$  or  $f_x^{t_0} = 0, f_x^{t_1} > 0, f_x^{t_2} = 0$  or  $f_x^{t_0} > 0, f_x^{t_1} = 0, f_x^{t_2} > 0$ . Fraction of such  
 591 genotypes were  $< 0.5\%$  for all segments except S9, for which it was  $4.5\%$

592 For further analysis, this amino acid dataset was used except when specified.

### 593 **Fitness estimation**

594 Number of cells in a pool with particular genotype  $x$  after time interval  $t$  increases  
 595 exponentially

$$596 n_x^t = n_x^0 \cdot \text{Exp}[s_x \cdot t],$$

597 where  $s_x$  is absolute fitness. Frequency of genotype  $x$  as well depends exponentially on absolute  
 598 fitness with an additional multiplicative factor:  
 599

600 
$$f_x^t = \frac{n_x^t}{N^t} = \frac{n_x^0 \cdot \text{Exp}[s_x \cdot t]}{N^t} = \frac{f_x^0 \cdot \text{Exp}[s_x \cdot t]}{N^t/N^0},$$

601 where  $N^t$  and  $N^0$  are total cell numbers in a pool at time points 0 and  $t$ . Factor  $\frac{1}{N^t/N^0}$  reflects the  
 602 total growth of population, it changes with time but is the same for all genotypes. Therefore, we  
 603 can rewrite genotype frequency at time  $t$  as:

604 
$$f_x^t = f_x^0 \cdot \text{Exp}[(s_x - s^{0t}) \cdot t],$$

605 where  $s^{0t} = \frac{1}{t} \cdot \text{Log} \left( \frac{N^t}{N^0} \right)$

606 In the measured dataset for each genotype  $x$  we have 3 measurements of frequency  $f_x^{t_0}$ ,  
 607  $f_x^{t_1}$ ,  $f_x^{t_2}$  and their errors  $\sigma^2(f_x^{t_0})$ ,  $\sigma^2(f_x^{t_1})$ ,  $\sigma^2(f_x^{t_2})$ . To estimate genotype fitness we minimized  
 608 relative squared errors of exponential fit as function of fitness  $s_x$  and initial frequency  $f_x^0$ :

609 
$$(s_x, f_x^0) = \text{argmin}_{s_x, f_x^0} \left( \frac{(f_x^{t_0} - f_x^0)^2}{\sigma^2(f_x^{t_0})} + \frac{(f_x^{t_1} - f_x^0 \cdot \text{Exp}[(s_x - s^{01}) \cdot t_1])^2}{\sigma^2(f_x^{t_1})} + \frac{(f_x^{t_2} - f_x^0 \cdot \text{Exp}[(s_x - s^{02}) \cdot t_2])^2}{\sigma^2(f_x^{t_2})} \right) \quad (1)$$

610 This formula contains four parameters common for all genotypes from one segment:  
 611  $s^{01}, s^{02}, t_1, t_2$ . Further we will perform additional shifting and scaling of fitness values (see next  
 612 section), therefore, without loss of generality we could sets  $s^{01} = 0$  and  $t_1 = 1$ . Ideally,  $t_2/t_1$  should  
 613 equal 14, however, we noticed that this ratio does not hold for many segments and fitted  
 614  $k = t_2/t_1$  from data instead of using value 14.

615 To find specific  $s^{02}$  and  $k$  for each segment we selected genotypes with high frequencies  
 616 at  $t_0$  ( $t_0 > 25 \cdot 10^{-6}$ ) which corresponds to  $\sim 500-1000$  reads per technical replicate. Each  
 617 segment contains  $10^3-10^4$  genotypes that meet this criterion. We minimized eq. (1) for selected  
 618 genotypes trying all possible combinations of  $(s^{02}, k)$  from a grid where  $s^{02} \in [0, 1.2]$  with step  
 619 0.01 and  $k \in [1, 14]$  with step 0.1 and choose  $(s^{02}, k)$  which gives minimal (\*).

620 Finally, given  $(s^{02}, k)$  for each segment we found  $s_x$  for each genotype. Errors for fitness  
 621 values,  $s_x^{std}$ , were estimated as standard error of best-fit parameter.

622  
 623 For genotypes with frequencies pattern  $f_x^{t_0} > 0, f_x^{t_1} = 0, f_x^{t_2} = 0$  fit of eq. (1) cannot be  
 624 obtained. Therefore we defined upper boundary for their fitness value as  $s_x^{boundary} =$   
 625  $\text{Log} \left( \frac{1}{\max(N_1^{t_1}, N_2^{t_1}, N_3^{t_1}, N_4^{t_1})} \right)$ , where  $N_i^{t_1}, i = 1..4$  are total read numbers at time point  $t_1$  in  $i$  replica.

626

### 627 ***Fitness rescaling***

628 We scaled fitness such that lethal genotypes have fitness 0 and neutral genotypes have  
 629 fitness 1. We assumed that genotypes with a stop codon or frame shift are lethal. Thus, for each  
 630 segment we linearly rescaled the fitness distribution so that 95% of genotypes with nonsense  
 631 mutations have a fitness of 0 and so that the local maximum of the fitness distribution of  
 632 genotypes with extant amino acids is 1. The scaling around the local maximum led to the shift of  
 633 fitness values of less than +/- 0.025 in each of the 12 segments compared to the measured  
 634 wildtype strains and did not affect our results (for scale, we called a substitution non-neutral if its  
 635 effect on fitness was  $> 0.4$ ). All fitness values which became smaller than 0 were set to 0.

636

### 637 ***Quality control and comparison of synonymous sequences***

638 We used nucleotide synonymous sequences as an internal control. The error rate for a  
 639 measurement of fitness of an amino acid sequence depends on the number of synonymous  
 640 sequences,  $n$ , that were used to estimate it. Therefore, we estimated the false discovery rates  
 641 separately for categories with  $n=1,..10$  variants. For each amino acid genotype with more than  $n$

642 synonymous variants we merged random combination of  $n$  of its nucleotide genotypes and  
643 estimated fitness. We then calculated the difference between this fitness and the fitness of the  
644 corresponding amino acid sequence. We classified case as “false unfit” if difference was  $<-0.4$   
645 and as “false fit” if difference was  $>0.4$ . The fraction of such cases gives us false discovery rates  
646 for genotypes having  $n$  synonymous variants. To get total false discovery rates for each segment  
647 we averaged “false unfit” and “false fit” rates for different  $n$  with weights equal to the fractions  
648 of genotypes in amino acid dataset which have  $n$  synonymous variant (**Supplementary Table 1**).  
649 The high correlation between biological replicas (**Supplementary Table 6**) confirms high  
650 accuracy of our high-throughput experiments, with the exception of segment 9.

651

### 652 **Predicting fitness using deep learning**

653 To predict the unidimensional fitness function based on additive contribution of extant  
654 amino acid states we used deep learning, a powerful machine learning technique, capable of  
655 constructing virtually any function, even with a simple neural network architecture. To convert  
656 amino acid sequences into a binary feature matrix we used one-hot encoding strategy, in which  
657 each feature (column in the matrix) indicates the presence or absence of a particular amino acid  
658 state.

659 To optimise the accuracy/overfitting ratio, we tested over a hundred of different neural  
660 network architectures and parameters. As a starting point, we selected a number of complicated  
661 architectures, which describe our data, but are prone to overfitting due to a large number of  
662 parameters. We then gradually reduced the number of layers and neurons to reduce the  
663 overfitting, while controlling for accuracy.

664 Our final architecture consists of three layers and 22 neurons in total (**Supplementary Fig.**  
665 **4**). Each of the neurons performs a linear transformation of the input and subsequently applies a  
666 non-linear activation function (a sigmoid) to the result. The output of the first layer, therefore, is  
667 a sigmoid of a linear transformation of the feature vector ( $c_1^T x$ ). The second layer decompresses  
668 the hidden nonlinear representation into 20 sigmoids, the combination of which is further  
669 linearly transformed with the only neuron of the third layer and wrapped into another sigmoid  
670 function:

671

$$F(x) = \sigma\left(\sum_{i=1}^{20} c_{3,i} \sigma(c_{2,i} \sigma(c_1^T x + b_1)) + b_{2,i}\right)$$

674

675

676 where  $\sigma(t) = \frac{1}{(1+\exp(-t))}$ ,  $x$  – is the feature vector,  $c_l$  – the vector of coefficients, corresponding to  
677 the first layer,  $c_{n,k}$  - coefficient corresponding to the  $n$ -th layer and the  $k$ -th neuron,  $b_n$  - bias  
678 corresponding to the  $n$ -th layer. Crucially, this relatively simple architecture is capable of fitting  
679 virtually any function<sup>53</sup>, thus, in contrast to conventional logistic regression, in our approach we  
680 select the correct model from a vast variety of functions.

681 The key idea of our approach is that the number of neurons in the first layer of the neural  
682 network determines the number of linear combinations of mutations (or fitness potentials) used  
683 in order to predict mutant fitness. In other words, each neuron in the first layer assigns a single  
684 unique weight to every amino acid state in the dataset (**Supplementary Fig. 4**). Multiplication of  
685 such weight vectors and binary genotype vectors result in fitness potential. Thus, the number of  
686 neurons in the first layer of the architecture basically determines the dimensionality of epistasis  
687 we assume. The obtained fitness potentials are then transformed by a nonlinear phase shift  
688 function constructed by the 22 neurons of the neural network.

689 The architecture simplicity avoids overfitting, which was further prevented by using early  
690 stopping and keeping 10% of data as a test set. The loss function that is being optimised in our  
691 experiments is not convex, which leads to a high probability of getting stuck in different local  
692 minima. To ensure reproducibility, each of our models was constructed ten independent times  
693 using random train-test splits.

694 Each model was trained for under 100 epochs using mean squared error as the loss  
695 function. An unpublished adaptive learning rate method proposed by Geoff Hinton, RMSProp,  
696 was used as the optimiser. This algorithm is a version of a mini-batch stochastic gradient  
697 descent, utilising the gradient magnitude of the recent gradients in order to normalise the current  
698 ones. All the weights were initialised using Xavier normal initialiser<sup>54</sup>.  
699

### 700 **Paths between pairs of fit genotypes**

701 For analysis in **Fig. 6d**, we first choose two fit “parental” genotypes, one randomly  
702 chosen genotype (eg: ABE) and the other parental genotype that is either *S. cerevisiae* wildtype  
703 genotype (inter-segmental) or another random fit genotype in the data (intra-segmental) (eg:  
704 abe). The two genotypes in this example are Hamming Distance 3 apart (HD=3). We next  
705 compute all (HD-2) intermediate genotypes (eg: AbC, aBc, *et cetera*) and retain the subset that  
706 were experimentally measured. We represent the two parental genotypes and all measured  
707 intermediate genotypes as an undirected graph in which each genotype is a vertex. All genotypes  
708 one substitution apart are connected by an unweighted edge. The shortest possible path for a  
709 given pair of genotypes is of length HD. We find all shortest paths between the two parental  
710 genotypes using a breadth-first search. We next remove all vertices (genotypes) that are unfit,  
711 and recompute the number of shortest between the two parental genotypes. For example, in **Fig.**  
712 **6a**, there are six paths of length three if you take into account all genotypes, but only three paths  
713 of length three if you take into account only fit genotypes.  
714

### 715 **Clustering of unfit genotypes in sequence space**

716 For the analysis in **Fig. 6e**, we first represent the two parental genotypes and all measured  
717 intermediate genotypes as an undirected graph in which each genotype is a vertex. All genotypes  
718 one substitution apart are connected by an unweighted edge. We can then compute the degree  
719 (number of genotypes of distance one) for each vertex (genotype). We do so randomly drawing  
720 from all measured genotypes and using only unfit genotypes or using the same number but  
721 randomly chosen genotypes. For the randomly chosen genotypes, the value is the average over  
722 1000 runs.  
723

### 724 **Quantifying sign epistasis**

725 For each substitution (eg: C -> S at position 141), we considered only those that exhibit a  
726 large fitness effect (abs. difference > 0.4) comprising a set of substitutions with large effects. For  
727 each substitution we divided the genetic backgrounds into two categories: those in which the  
728 substitution caused a > 0.4 increase in fitness, and those backgrounds in which the substitution  
729 caused > 0.4 decrease in fitness. A single substitution can cause a large increase in fitness in  
730 some backgrounds and a large decrease in others due to two possible reasons: sign epistasis or  
731 experimental error. To differentiate the two cases, we identified secondary substitutions that  
732 significantly alter the ratio of large increases to large decreases in fitness (Fisher’s exact test,  
733 Bonferroni corrected p-value < 0.05). We only consider a site to be under sign epistasis if there  
734 is a second site that alters the frequency of sign epistasis in a statistically significant manner, i.e.  
735 more frequently than expected by chance alone.  
736

### 737 **Structural analysis**

738

#### 739 *Structure prediction*

740 An initial model was obtained with the I-TASSER server<sup>55</sup>. The list of top 10 PDB  
741 structural templates picked up by the I-TASSER included high-quality crystal structures of  
742 imidazoleglycerol-phosphate dehydratases from *Arabidopsis thaliana* and *Cryptococcus*  
743 *neoformans*. Coordinates of the top-scoring model (C-score=0.21, estimated TM-score =  
744 0.74±0.11, estimated RMSD = 5.1±3.3Å) and the predicted normalized B-factor<sup>56</sup> were used for  
745 further analysis. The value of the model quality metric (TM-score >0.5) indicates a model of

746 correct topology. The proteins structurally close to the final model (RMSD 0.6 - 1.7Å are PDB  
747 IDs 4MU0, 4GQU, 1RHY, 5DNL and 2AE8 from *Arabidopsis thaliana*, *Mycobacterium*  
748 *tuberculosis*, *Cryptococcus neoformans*, *Pyrococcus furiosus* and *Staphylococcus aureus*.

749 We measured the distribution of distances (in angstroms) between pairs of residues that  
750 exhibit strong sign epistasis (**Supplementary Table 1**, ReallyPositivePair == TRUE), and  
751 compared it with the distribution of pairwise distances among residues for which we have  
752 sufficient data to be certain that a given pair does not exhibit sign epistasis (**Supplementary**  
753 **Table 1**, ReallyNegativePair == TRUE).

754

#### 755 *ΔΔG prediction*

756 Cartesian\_ddg application<sup>57</sup> from Rosetta version 2017.08.59291 was used for ΔΔG  
757 predictions. Top-scoring I-TASSER model was pre-minimized using the Relax<sup>58</sup> application in  
758 dual-space<sup>59</sup> with the flags: -relax:dualspace true; -ex1; -ex2; -use\_input\_sc; -flip\_HNQ; -  
759 no\_optH false; -relax:min\_typedbfgs\_armijo\_nonmonotone; -nonideal. The best scoring model  
760 from 1000 structures was selected. The effect of up to 4 mutations (54,500 genotypes in total)  
761 was assessed in Cartesian space with the Talaris\_2014 score function, and the -fa\_max\_dis 9.0  
762 flag. ΔΔG was estimated as a difference of mean score for 3 independent runs for every mutant  
763 and the wild-type score.

764

765



766

767 **Figures**

768

769 **Figure 1. Combinatorial approach to the study of fitness landscapes.** A fitness landscape is  
770 the representation of fitness for all possible genotypes composed of a specific set of loci. **a**,  
771 Following Figure 1 from Sewall Wright ref. [6] consider the genotype space consisting of 5 loci,  
772 each with two allele states (lower and uppercase letters). The entire genotype space is 5-  
773 dimensional consisting of  $2^5$  genotypes. Given two genotypes found in extant species (abCde and  
774 ABCdE in this example), surveying combinations of extant alleles substantially reduces the  
775 dimensionality of the genotype space, concomitantly reducing the number of genotypes to assay.  
776 The surveyed area (blue cube) considers all combinations of allele substitutions that have  
777 occurred in the course of evolution between the two sequences (red line), avoiding the sampling  
778 of combinations with less relevance to the evolutionary trajectory (black lines). **b**, Given the  
779 entire multidimensional genotype space (black circle) our approach considers an  
780 multidimensional subspace consisting of the combinatorial set of amino acid states from extant  
781 species. The blue line represents the yeast phylogeny and the surrounding blue space represents a  
782 multidimensional set of combinations of extant amino acids of the sequence under consideration,  
783 one His3 gene segment in our study. By contrast, random mutagenesis studies consider only a  
784 local segment of the genotype space surrounding a specific genotype (green circle). **c**, A multiple  
785 alignment of orthologous sequences of His3 for segment 2 for which we incorporated almost all  
786 extant amino acid states from 21 yeast species (blue bars) and 10-100% extant states from a set  
787 of 396 orthologues (grey bars). **d**, The predicted structure of His3p with amino acid residues that  
788 were substituted in our library.

789

790 **Figure 2. Visual representations of the fitness landscape.** **a**, The fitness landscape for all  
791 assayed genotypes in segment 7. Nodes represent unique amino acid sequences with edges  
792 connecting those separated by a single amino acid substitution. Colour saturation represents the  
793 minimum fitness of the two connected nodes. **b**, For segment 7, fitness of ancestral and extant  
794 nodes and genotypes one substitution away from the nodes in the background of *S. cerevisiae*  
795 gene on the yeast phylogeny (black lines), are shown in colour ranging from grey (lowest fitness)  
796 to blue (highest fitness).

797

798

799

800 **Figure 3. Fitness distributions.** **a**, The distribution of fitness for genotypes composed of  
801 combination of extant amino acid states (green) and non-extant amino acid states (purple) at the  
802 same positions. **b**, The fraction of unfit genotypes per segment among genotypes consisting  
803 entirely from extant amino acid states (green) and those incorporating non-extant amino acid  
804 states (purple). **c**, The number of genotypes with high fitness that incorporates specific amino  
805 acid states. For each amino acid state, the number of genetic backgrounds that contain that amino  
806 acid state and are fit (fitness > 0) are shown. **d**, The percent of backgrounds in which a specific  
807 substitution is neutral (white), beneficial (blue) or deleterious (grey). The region marked in green  
808 shows substitutions that never have large effects (> 0.4) on fitness. Beneficial and deleterious  
809 effects are shown only if the frequency for a given substitution was higher than the false  
810 discovery rate (**Supplementary Table 1**). Data from segment 9 were excluded for this figure.

811

812

813

814

815 **Figure 4. Epistasis and the His3 fitness landscape for segments 2, 5 and 7.** **a**, Fitness as a  
816 function of a single fitness potential (black curve, the fitness of individual genotypes is orange).  
817 **b**, A network depiction of sign epistasis between amino acid substitutions. Colour coded sites  
818 with reciprocal sign epistasis (black lines) and unidirectional interactions (grey arrows) are  
819 shown. **c**, Genotypes containing substitutions with a higher number of sign epistatic interactions  
820 are less likely to be fit by the threshold function of the fitness potential. **d**, Increasing the number  
821 of neurons in the first layers of the neural network, which is equivalent to increasing the number  
822 of underlying fitness potentials, leads to more accurate models for segments with detected sign  
823 epistasis. Each dot corresponds to an independent optimization of model parameters. **e**, Fitness  
824 as a function of two fitness potentials (black dots, measured fitness is depicted in orange).

825

826 **Figure 5. Sign epistasis.** **a**, Substitution C->S at site 141 in segment 2 more frequently has a  
827 positive effect on fitness in the background of T at site 143, a negative effect in the background  
828 of 143I and is equally likely to be strongly deleterious or strongly beneficial in the background  
829 of 143V. **b**, Predicted change in free energy following a C141S substitution in all genetic  
830 backgrounds with an I or T at 143 and that are closer than four mutations away from *S.*  
831 *cerevisiae*. **c**, Distribution of the number of substitutions at each site under sign (yellow) and  
832 reciprocal sign (orange) epistasis. Sites with 0 interactions do not exhibit sign epistasis. **d**, The  
833 fraction of genotypes in which the substitution under sign epistasis has the less frequent effect on  
834 fitness.

835

836

837

838 **Figure 6. Analysis of evolutionary pathway accessibility.** **a**, A threshold fitness potential  
839 function can lead to some paths being inaccessible between two genotypes of high fitness (abe,  
840 ABE) if the joint contribution of several alleles to the fitness potential (abE, aBE) leads to the  
841 fitness potential below the threshold. **b**, The fraction of unfit intermediate genotypes between  
842 two fit genotypes as a function of their average fitness potential. **c**, The grey area represents all  
843 genotypes in segment 7. When two fit genotypes (red dots) have high fitness potential, many  
844 paths between them will be accessible because many intermediate genotypes will also have high  
845 fitness potential and fitness (blue dots). **d**, The fraction of accessible shortest paths between two  
846 fit genotypes with unfit genotypes from data (orange) or the same number of randomly selected  
847 genotypes (grey), shown as a function of Hamming distance between two fit genotypes. Error  
848 bars are standard deviation. **e**, On a graph with genotypes connected by edges if they are one  
849 substitution apart we calculate the degree of connectivity (number of edges for each node) for all  
850 genotypes (blue), only unfit (fitness = 0) genotypes (orange) and a graph with the same number  
851 of nodes as the graph with unfit genotypes but with nodes chosen at random (grey).

852

853

854

## 855 **Supplementary Figures**

856

857 **Supplementary Figure 1. Experimental design.** **a**, The sequence of the His3 protein from *S.*  
858 *cerevisiae* was separated into 12 independent segments of similar lengths, such that the full  
859 combinatorial set of extant amino acid substitutions was less than 100,000 possible genotypes.  
860 These segments represented different combinations of structural elements of the His3 protein  
861 structure. **b**, For each of the 12 segments from His3, we selected extant amino acid states using a  
862 multiple alignment of His3 orthologues from 396 species, preferentially incorporating states  
863 from 21 yeast species, the variability is shown in segment 3 as an example. Mutant degenerate  
864 codon libraries were constructed by fusion PCR of two synthesized variable halves of each  
865 segment. These high-complexity plasmid libraries were transformed into haploid His3 knockout  
866 *S. cerevisiae* strain. The growth rate of yeast carrying different extant amino acid state  
867 combinations in His3 gene was measured using serial batch culture in the absence of histidine  
868 with 12 hours between ~100-fold dilutions. To estimate the fitness of yeast mutants their relative  
869 abundance was measured at three points: in the initial population before selection ( $t_0$ ), in the  
870 population after 12 hours of growth in the selective medium ( $t_1$ ), and in the final population after  
871 168 hours of growth in the selective medium ( $t_{14}$ ). To assess the fitness of individual mutants  
872 the segments from three populations were amplified and sequenced. The relative abundance of  
873 each sequence was used as a proxy for abundance of the associated yeast mutant, which in turn  
874 determines its fitness. **c**, Secondary structure of His3 mapped to the segments in our  
875 experiments.

876

877 **Supplementary Figure 2. Segment-specific fitness distributions for extant and non-extant**  
878 **amino acid states.** **a**, The fitness distribution for each segment for genotypes consisting only of  
879 extant amino acid states (green) or that contain one or more non-extant amino acid states  
880 (purple) only at positions with a substitution in the extant library. **b**, The fitness distribution for  
881 each segment for genotypes consisting only of extant amino acid states (green) and genotypes  
882 with mutations at other positions in that segment (red).

883

884 **Supplementary Figure 3. Growth rate measurement of isolated strains.** **a**, Comparison of  
885 fitness values from the pooled competition assay with growth rates of isolated strains as  
886 measured in a microplate reader. Error bars for growth rates show s.e.m. of 6 replicates. **b**,  
887 Pearson correlation coefficients between fitness values from competition and growth rates of  
888 isolated strains for each segment. \*\* signifies p-value < 0.005 (correlation test). **c**, His3p  
889 orthologues from different species complement a  $\Delta$  his3 deletion in *S. cerevisiae*. Growth rates  
890 of transformants containing whole HIS3 orthologous genes from other yeast species. Error bars  
891 for growth rates show s.e.m. of  $\geq 7$  replicates.

892

893 **Supplementary Figure 4. Schematic representation of the deep learning approach.** Each  
894 genotype was encoded as a binary vector ( $x$ ). During training, each of the substitutions was  
895 assigned a coefficient ( $c_i$ ), comprising a vector of coefficients ( $c$ ). The multiplication of these  
896 two vectors is the fitness potential of the genotype. After going through three layers, each with a  
897 sigmoid activation function, the predicted fitness is obtained.

898

899 **Supplementary Figure 5. The fitness potential of the His3 fitness landscape.** **a**, Fitness  
900 potential predicted by the neural network as a function of the measured fitness for all 12  
901 segments. **b**, The correlation between the fitness predicted by the fitness potential and the  
902 measured fitness. **c**, Training and test  $R^2$  for each segment for 20-fold cross-validation.

903

904

905

906 **Supplementary Figure 6. Sign epistasis dimensionality graphs for all twelve segments.** Each  
907 node represents a substitution, with multiple substitutions at the same site having the same  
908 colour. Substitutions under reciprocal sign epistasis are indicated by black lines while grey  
909 arrows indicate unidirectional sign epistasis.

910

911

912 **Supplementary Figure 7. Multidimensional description of epistasis in His3 segments. a,**  
913 Increasing the number of neurons in the first layer of the neural network, which is equivalent to  
914 increasing the number of underlying fitness potentials, leads to more accurate models for  
915 segments with detected sign epistasis. Each dot corresponds to an independent optimization of  
916 model parameters. **b,** Number of sign epistatic interactions of certain substitutions against  
917 average model prediction power for mutants including these substitutions.

918

919 **Supplementary Figure 8. Protein stability and the fitness potential. a,** A comparison of  
920 correlation coefficients between predicted and measured values across segments. **b,c,**  
921 correlations between the estimated impact of substitutions on free energy ( $\Delta\Delta G$ ), fitness  
922 potential and fitness.  $\Delta\Delta G$  correlates better with fitness potential than with fitness. **d,** Pairs of  
923 sites that exhibit sign (connected by a light edge in Supplementary Figure 6) and those that  
924 exhibit reciprocal sign epistasis (connected by a dark edge in Supplementary Figure 6) are closer  
925 together in the His3p structure than randomly chosen non-connected pairs of positions that  
926 exhibit sign epistasis.

927

928 **Supplementary Figure 9. Decoupling inter- and intra-segmental epistasis. a,** The fraction of  
929 unfit genotypes between *S. cerevisiae* and any other genotype consisting of extant amino acid  
930 states with high (blue) or any (red) fitness, and genotypes in the latter but not the former  
931 category (black) as a function of the Hamming distance between the two boundary genotypes.  
932 Points indicate median, the bars and lines indicate 50% of the genotypes and genotypes 2.7  
933 sigmas from the mean, respectively. **b,** The neural network model assigns higher weights to  
934 amino acid states that first occur in His3 orthologues farther from *S. cerevisiae*, indicating  
935 the presence of intrasegmental interactions.

936

937 **Supplementary Information 1. Multiple alignment of His3 orthologues.**

938

939 **Supplementary Information 2. Multidimensional description of epistasis in His3**  
940 **segments.** Fitness as a function of two fitness potentials (black dots, measured fitness is depicted  
941 in orange).

942

943

944

945 **References**

946

947 1. Dean, A. M. & Thornton, J. W. Mechanistic approaches to the study of evolution: the  
948 functional synthesis. *Nature Rev. Genet.* **8**, 675–688 (2007).

949

950 2. Kogenaru, M., de Vos, M. G. J., & Tans, S. J. Revealing evolutionary pathways by fitness  
951 landscape reconstruction. *Crit. Rev. Biochem. Mol. Biol.* **44**, 169–174 (2009).

952

953 3. Mackay, T. F. C. Epistasis and quantitative traits: using model organisms to study gene-gene  
954 interactions. *Nature Rev. Genet.* **15**, 22–33 (2014).

955

956 4. de Visser, J. A. G. M. & Krug, J. Empirical fitness landscapes and the predictability of  
957 evolution. *Nature Rev. Genet.* **15**, 480–490 (2014).

958

959 5. de Visser, J. A. G. M., Cooper, T. F., & Elena, S. F. The causes of epistasis. *Proc. Biol. Sci.*  
960 **278**, 3617–3624 (2011).

961

962 6. Wright, S. The roles of mutation, inbreeding, crossbreeding and selection in evolution. *Proc.*  
963 *Sixth Int. Congr. Genet.* **1**, 356–366 (1932).

964

965 7. Olson, C. A., Wu, N. C. & Sun, R. A comprehensive biophysical description of pairwise  
966 epistasis throughout an entire protein domain. *Curr. Biol.* **24**, 2643–2651 (2014).

967

968

969 8. Puchta, O., Cseke, B., Czaja, H., Tollervey, D., Sanguinetti, G., and Kudla, G. Network of  
970 epistatic interactions within a yeast snoRNA. *Science.* **352**, 840–844 (2016).

971

972 9. Li, C. Qian, W. Maclean, C. J. & Zhang, J. The fitness landscape of a tRNA gene. *Science*  
973 **352**, 837–840 (2016).

974

975 10. Sarkisyan, K.S., et al. Local fitness landscape of the green fluorescent protein. *Nature* **533**,  
976 397–401 (2016.)

977

978 11. Hietpas, R. T., Bank, C., Jensen, J. D. & Bolon, D. N. A. Shifting fitness landscapes in  
979 response to altered environments. *Evolution* **67**, 3512–3522 (2013).

980

981 12. Parera, M. & Martinez, M. A. Strong epistatic interactions within a single protein. *Mol. Biol.*  
982 *Evol.* **31**, 1546–1553 (2014).

983

984 13. Podgornaia, A. I. & Laub, M. T. Pervasive degeneracy and epistasis in a protein-protein  
985 interface. *Science* **347**, 673–677 (2015).

986

987 14. Anderson, D. W. McKeown, A. N. & Thornton, J. W. Intermolecular epistasis shaped the  
988 function and evolution of an ancient transcription factor and its DNA binding sites. *Elife* **4**,  
989 e07864 (2015).

990

991 15. Meini, M. R., Tomatis, P. E., Weinreich, D. M. & Vila, A. J. Quantitative description of a  
992 protein fitness landscape based on molecular features. *Mol. Biol. Evol.* **32**, 1774–1787 (2015).

993



- 994 16. Bank, C., Matuszewski, S., Hietpas, R. T. & Jensen, J. D. On the (un)predictability of a large  
995 intragenic fitness landscape. *Proc. Natl. Acad. Sci. USA*. 113, 14085–14090 (2016).  
996
- 997 17. Poelwijk, F.J., Kiviet, D.J., Weinreich, D.M., & Tans, S.J. Empirical fitness landscapes  
998 reveal accessible evolutionary paths. *Nature* **445**, 383–386(2007).  
999
- 1000 18. Gong, L. I. Suchard, M. A. & Bloom, J.D. Stability-mediated epistasis constrains the  
1001 evolution of an influenza protein. *Elife* **2**, e00631(2013).  
1002
- 1003 19. Gong, L. I. & Bloom, J.D. Epistatically interacting substitutions are enriched during adaptive  
1004 protein evolution. *PLoS Genet.* **10**, e1004328(2014).  
1005
- 1006 20. Starr, T. N. & Thornton, J. W. Epistasis in protein evolution. *Protein Sci.* **25**, 1204–1218  
1007 (2016).  
1008
- 1009 21. Kumar, A. Natarajan, C. Moriyama, H. Witt, C.C. Weber, R.E. Fago, A. & Storz, J.F.  
1010 Stability-mediated epistasis restricts accessible mutational pathways in the functional evolution  
1011 of avian hemoglobin. *Mol. Biol. Evol.* **34**, 1240–1251(2017).  
1012
- 1013 22. Tufts, D. M., *et al.* Epistasis constrains mutational pathways of hemoglobin adaptation in  
1014 high-altitude pikas. *Mol. Biol. Evol.* **32**, 287–298 (2015).  
1015
- 1016 23. Eyre-Walker A. & Keightley P. D. The distribution of fitness effects of new mutations. *Nat.*  
1017 *Rev. Genet.* **8**, 610–618 (2007).  
1018
- 1019 24. Draghi, J. A. & Plotkin, J. B. Selection biases the prevalence and type of epistasis along  
1020 adaptive trajectories. *Evolution* **67**, 3120–3131 (2013).  
1021
- 1022 25. Lunzer, M., Miller, S. P., Felsheim, R. & Dean, A. M. The biochemical architecture of an  
1023 ancient adaptive landscape. *Science* **310**, 499–501 (2005).  
1024
- 1025 26. Palmer, A. C., Toprak, E., Baym, M., Kim, S., Veres, A., Bershtein, S. & Kishony, R.  
1026 Delayed commitment to evolutionary fate in antibiotic resistance fitness landscapes. *Nat.*  
1027 *Commun.* **6**, 7385 (2015).  
1028
- 1029 27. Lalić, J. & Elena, S. F. Magnitude and sign epistasis among deleterious mutations in a  
1030 positive-sense plant RNA virus. *Heredity* **109**, 71–77 (2012).  
1031
- 1032 28. Keefe, A. D. & Szostak, J. W. Functional proteins from a random-sequence library. *Nature*  
1033 **410**, 715–718 (2001).  
1034
- 1035 29. du Plessis, L. Leventhal, G.E. & Bonhoeffer, S. How good are statistical models at  
1036 approximating complex fitness landscapes? *Mol. Biol. Evol.* **33**, 2454–2468(2016).  
1037
- 1038 30. Lum, P. Y. Edwards, S. & Wright, R. Molecular, functional and evolutionary characterization  
1039 of the gene encoding HMG-CoA reductase in the fission yeast, *Schizosaccharomyces pombe*.  
1040 *Yeast* **12**, 1107–1124 (1996).  
1041
- 1042 31. Kondrashov, A.S. Sunyaev, S. & Kondrashov, F. A. Dobzhansky-Muller incompatibilities in  
1043 protein evolution. *Proc. Natl. Acad. Sci. USA* **99**, 14878–14883 (2002).  
1044

- 1045 32. Kvitek, D. J. & Sherlock, G. Reciprocal sign epistasis between frequently experimentally  
1046 evolved adaptive mutations causes a rugged fitness landscape. *PLoS Genet.* **7**, e1002056 (2011).  
1047
- 1048 33. Breen, M. S., Kemena, C., Vlasov, P. K., Notredame, C. & Kondrashov, F. A. Epistasis as  
1049 the primary factor in molecular evolution. *Nature* **490**, 535–538 (2012).  
1050
- 1051 34. Gavrillets, S. Evolution and speciation on holey adaptive landscapes. *Trends Ecol. Evol.* **12**,  
1052 307–312(1997).  
1053
- 1054 35. Salverda, M. L. M., Dellus, E., Gorter, F. A., Debets, A.J. M., van der Oost, J. Hoekstra, R.  
1055 F. Tawfik, D. S. & de Visser, J.A.G. M. Initial mutations direct alternative pathways of protein  
1056 evolution. *PLoS Genet.* **7**, e1001321(2011).  
1057
- 1058 36. Weinreich, D. M., Delaney, N. F., de Pisto, M. A. & Hartl, D.L. Darwinian evolution can  
1059 follow only very few mutational paths to fitter proteins. *Science* **312**, 111–114(2006).  
1060
- 1061 37. Milkman, R. Selection differentials and selection coefficients. *Genetics* **88**, 391–403 (1978).  
1062
- 1063 38. Kimura, M. & Crow J. F. Effect of overall phenotypic selection on genetic change at  
1064 individual loci. *Proc. Natl. Acad. Sci. USA.* **75**, 6168–6171 (1978).  
1065
- 1066 39. Kondrashov, F. A. & Kondrashov, A. S. Multidimensional epistasis and the disadvantage of  
1067 sex. *Proc. Natl. Acad. Sci. USA.* **98**, 12089–12092 (2001).  
1068
- 1069 40. Crow, J. F. & Kimura, M. Efficiency of truncation selection. *Proc. Natl. Acad. Sci. USA* **76**, 396–  
1070 399 (1979).  
1071
- 1072 41. Weinreich, D. M. Lan, Y. Wylie, C. S. & Heckendorn, R. B. Should evolutionary geneticists  
1073 worry about higher-order epistasis? *Curr. Opin. Genet. Dev.* **23**, 700–707 (2013).  
1074
- 1075 42. Poelwijk, F.J. Krishna, V. & Ranganathan, R. The Context-Dependence of Mutations: A  
1076 Linkage of Formalisms. *PLoS Comput. Biol.* **12**, e1004771 (2016).  
1077
- 1078 43. Sailer, Z. R. & Harms, M. J. High-order epistasis shapes evolutionary trajectories. *PLoS*  
1079 *Comput. Biol.* **13**, e1005541 (2017).  
1080
- 1081 44. Weinreich, D. M. Watson, R. A. & Chao, L. Perspective: Sign epistasis and genetic  
1082 constraint on evolutionary trajectories. *Evolution* **59**, 1165–1174 (2005).
- 1083 45. Rokyta, D. R. et al. Epistasis between beneficial mutations and the phenotype-to-fitness Map  
1084 for a ssDNA virus. *PLoS Genet.* **7**, e1002075 (2011).  
1085
- 1086 46. Kondrashov, D. A. & Kondrashov, F. A. Topological features of rugged fitness landscapes in  
1087 sequence space. *Trends Genet.* **31**, 24–33 (2015).  
1088
- 1089 47. De Pisto, M. A. Weinreich, D. M. & Hartl, D. L. Missense meanderings in sequence space:  
1090 a biophysical view of protein evolution. *Nature Rev. Genet.* **6**, 678–687 (2005).
- 1091 48. Bershtein, S., Segal, M., Bekerman, R., Tokuriki, N. & Tawfik, D. S. Robustness epistasis  
1092 link shapes the fitness landscape of a randomly drifting protein. *Nature* **444**, 929–932 (2006).
- 1093 49. Orr, H. A. The population genetics of speciation: the evolution of hybrid incompatibilities.  
1094 *Genetics* **139**, 1805–1813 (1995).

- 1095 50. Tamura, K., Stecher, G., Peterson, D., Filipski, A. & Kumar, S. MEGA6: Molecular  
1096 Evolutionary Genetics Analysis version 6.0. *Mol Biol Evol.* **30**, 2725–2729 (2013).
- 1097 51. Magoč, T. & Salzberg, S. L. FLASH: fast length adjustment of short reads to improve  
1098 genome assemblies. *Bioinformatics* **27**, 2957–2963 (2011).
- 1099 52. Zorita, E., Cuscó, P. & Filion, G. J. Starcode: sequence clustering based on all-pairs search.  
1100 *Bioinformatics* **31**, 1913–1919 (2015).
- 1101 53. LeCun, Y., Bengio, Y. & Hinton, G. Deep learning. *Nature.* **521**, 436–444 (2015).
- 1102 54. Glorot, X. & Bengio, Y. Understanding the difficulty of training deep feedforward neural  
1103 networks. In Proceedings of the 13th International Conference on Artificial Intelligence and  
1104 Statistics (2010).  
1105
- 1106 55. Yang, J. & Zhang, Y. I-TASSER server: new development for protein structure and function  
1107 predictions. *Nucleic Acids Res.* **43**, W174–W181(2015).
- 1108 56. Yang, J., Wang, Y. & Zhang, Y. ResQ: An Approach to Unified Estimation of B-Factor and  
1109 Residue-Specific Error in Protein Structure Prediction. *J. Mol. Biol.* **428**, 693–701 (2016).  
1110
- 1111 57. Park, H., Bradley, P., Greisen, P. Jr., Liu, Y., Mulligan, V. K., Kim, D.E., Baker, D. &  
1112 DiMaio, F. Simultaneous optimization of biomolecular energy functions on features from small  
1113 molecules and macromolecules. *J. Chem. Theory Comput.* **12**, 6201–6212 (2016).
- 1114 58. Nivón, L. G., Moretti, R. & Baker, D. A Pareto-optimal refinement method for protein  
1115 design scaffolds. *PLoS One* **8**, e59004 (2013).
- 1116 59. Conway, P., Tyka, M. D., DiMaio, F., Konerding, D. E. & Baker, D. Relaxation of backbone  
1117 bond geometry improves protein energy landscape modeling. *Protein Sci.* **23**, 47–55 (2014).

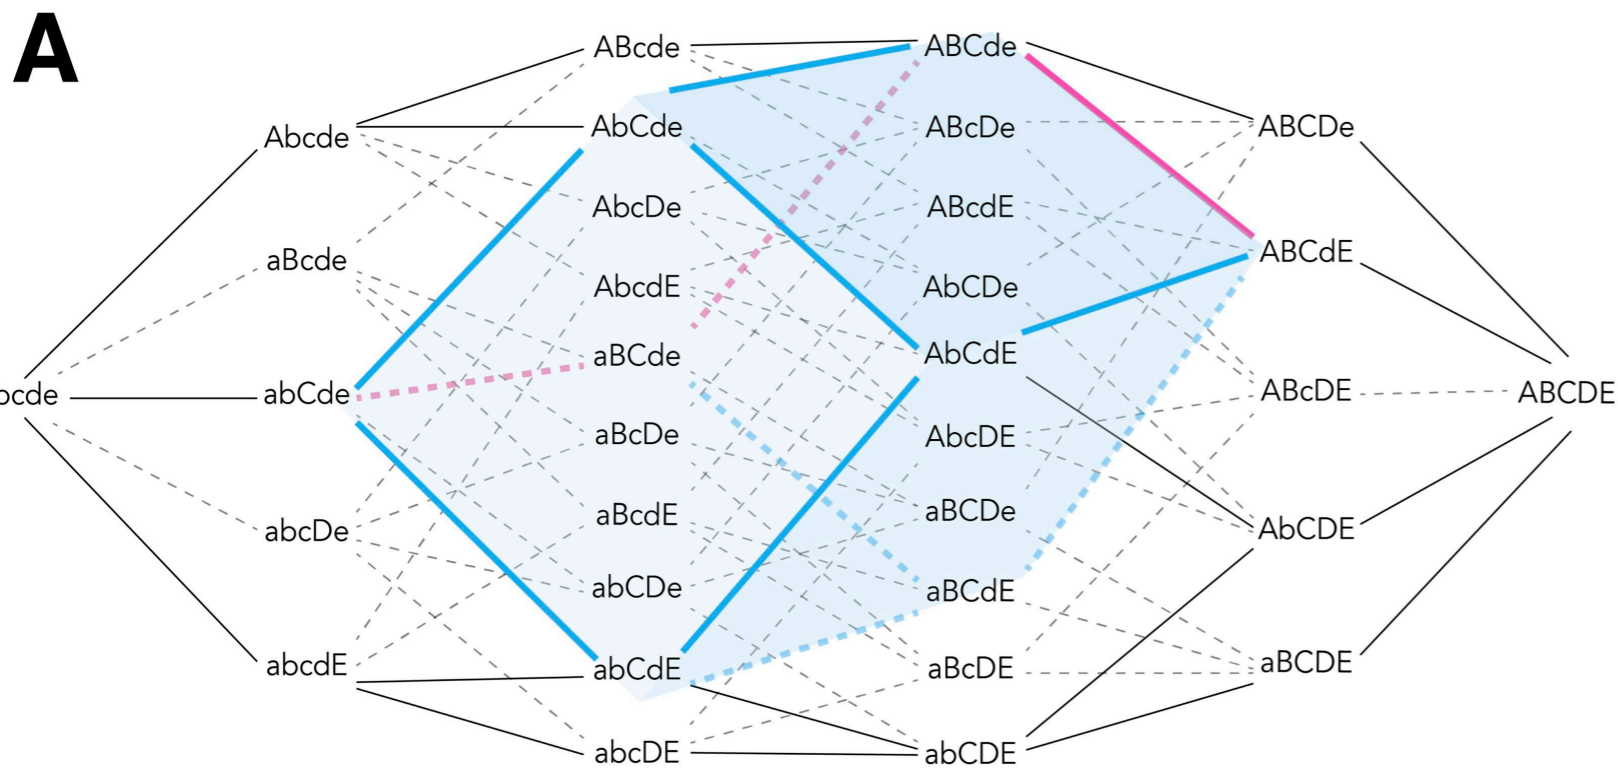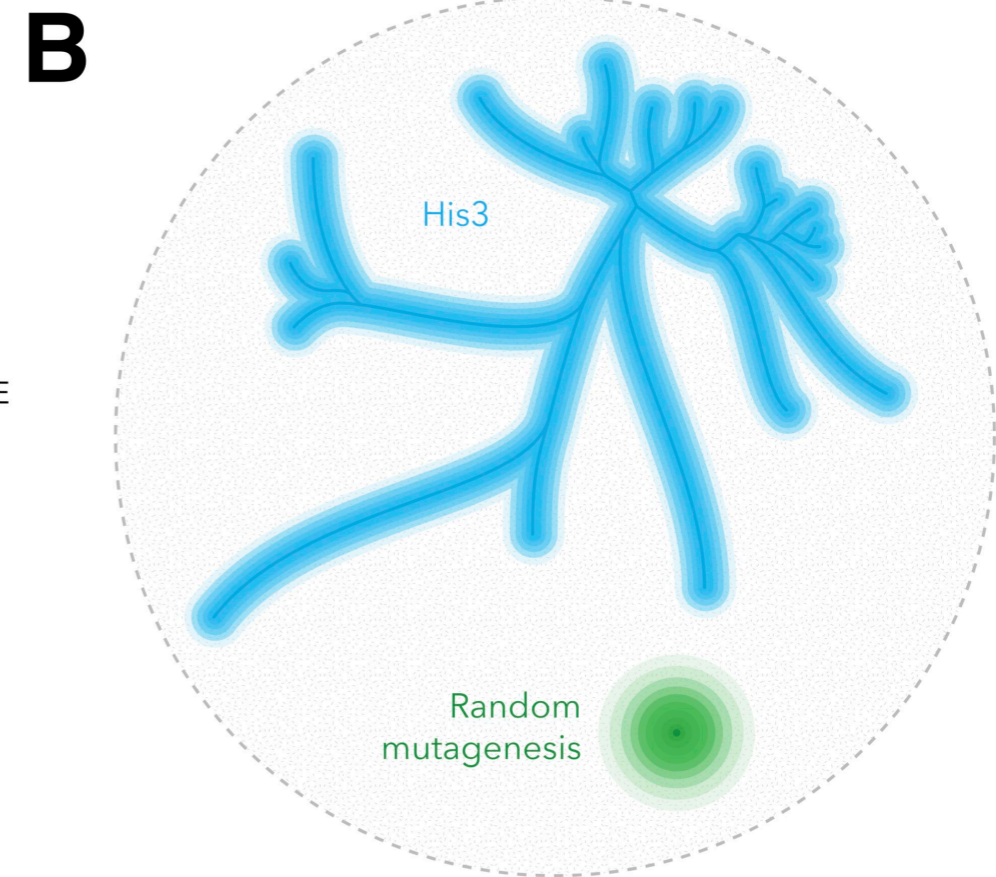

**C** His3 extant sequence variant library

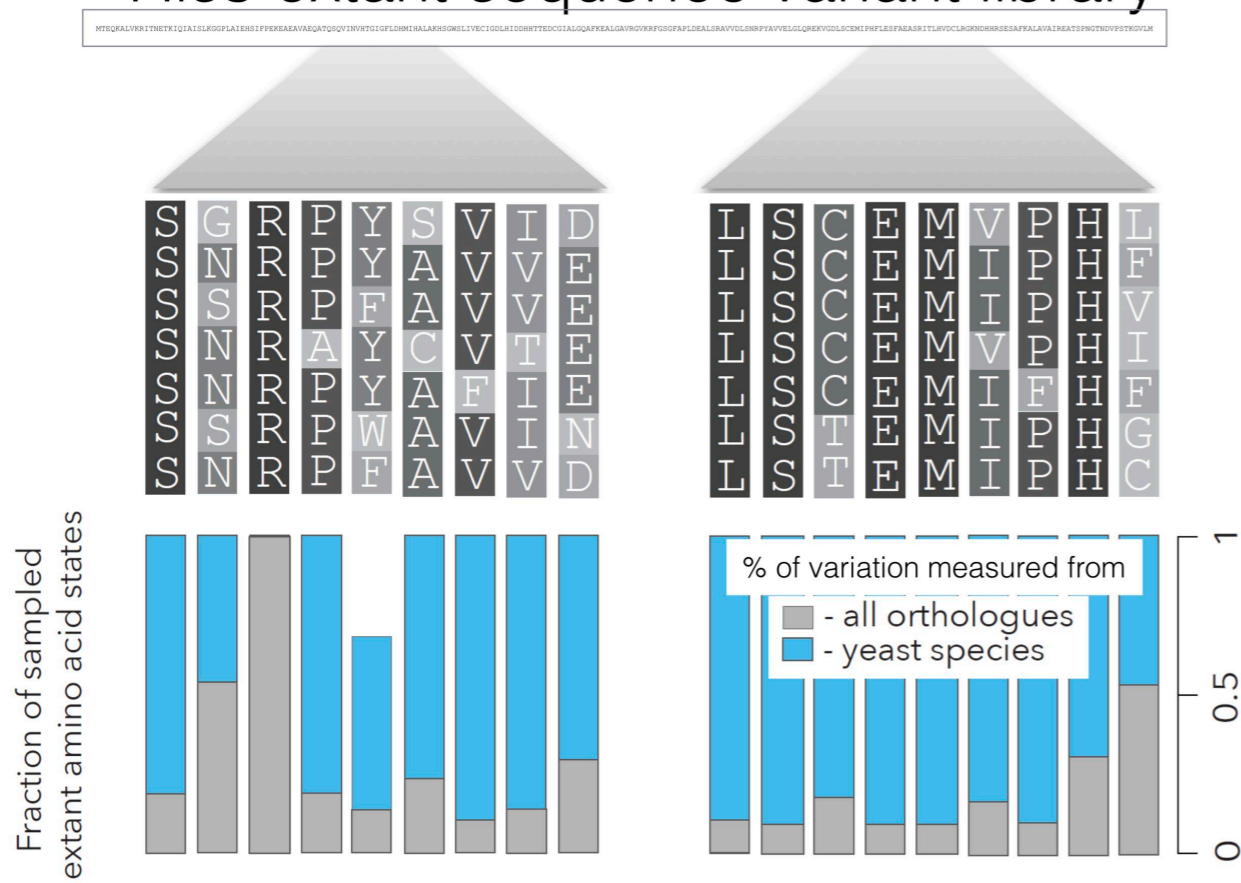

**D**

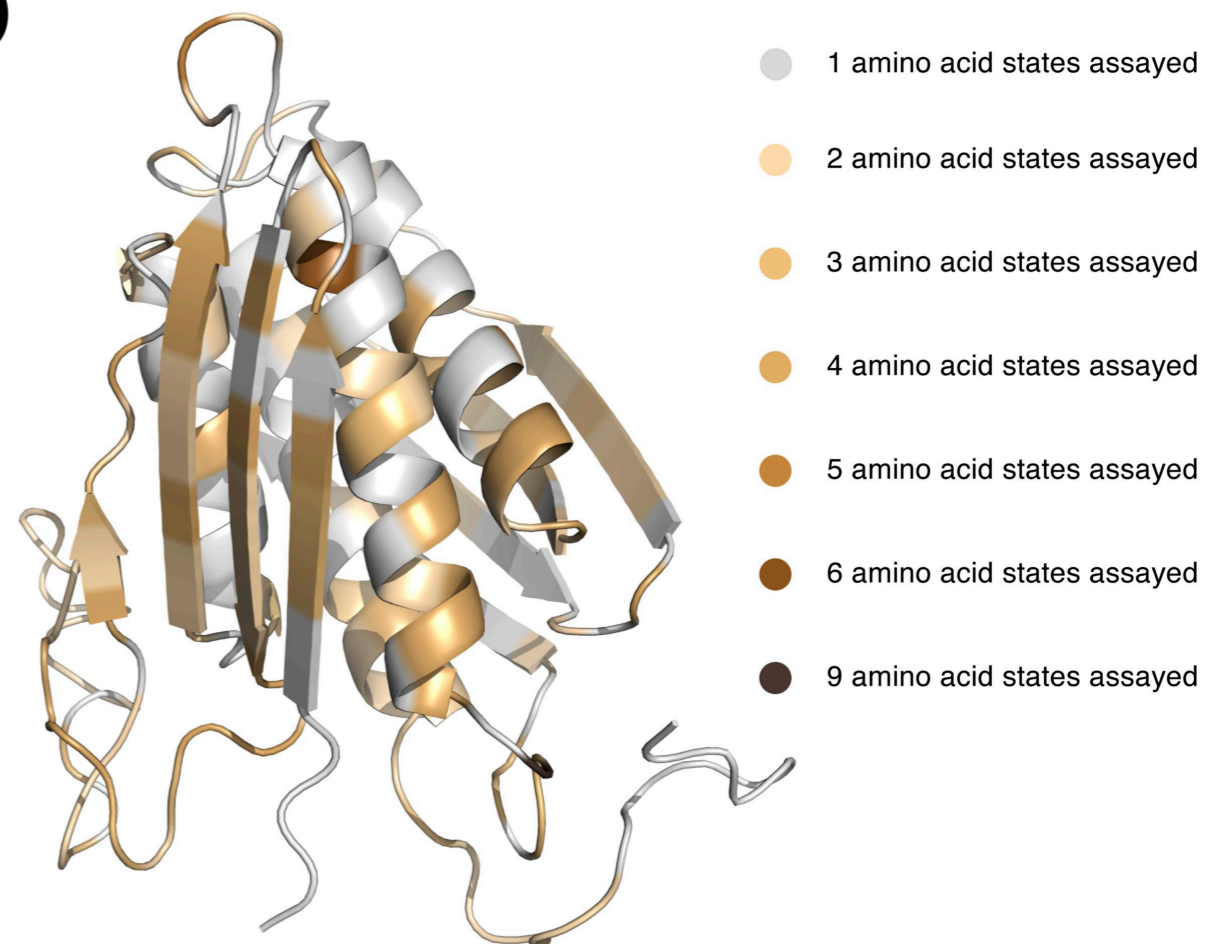

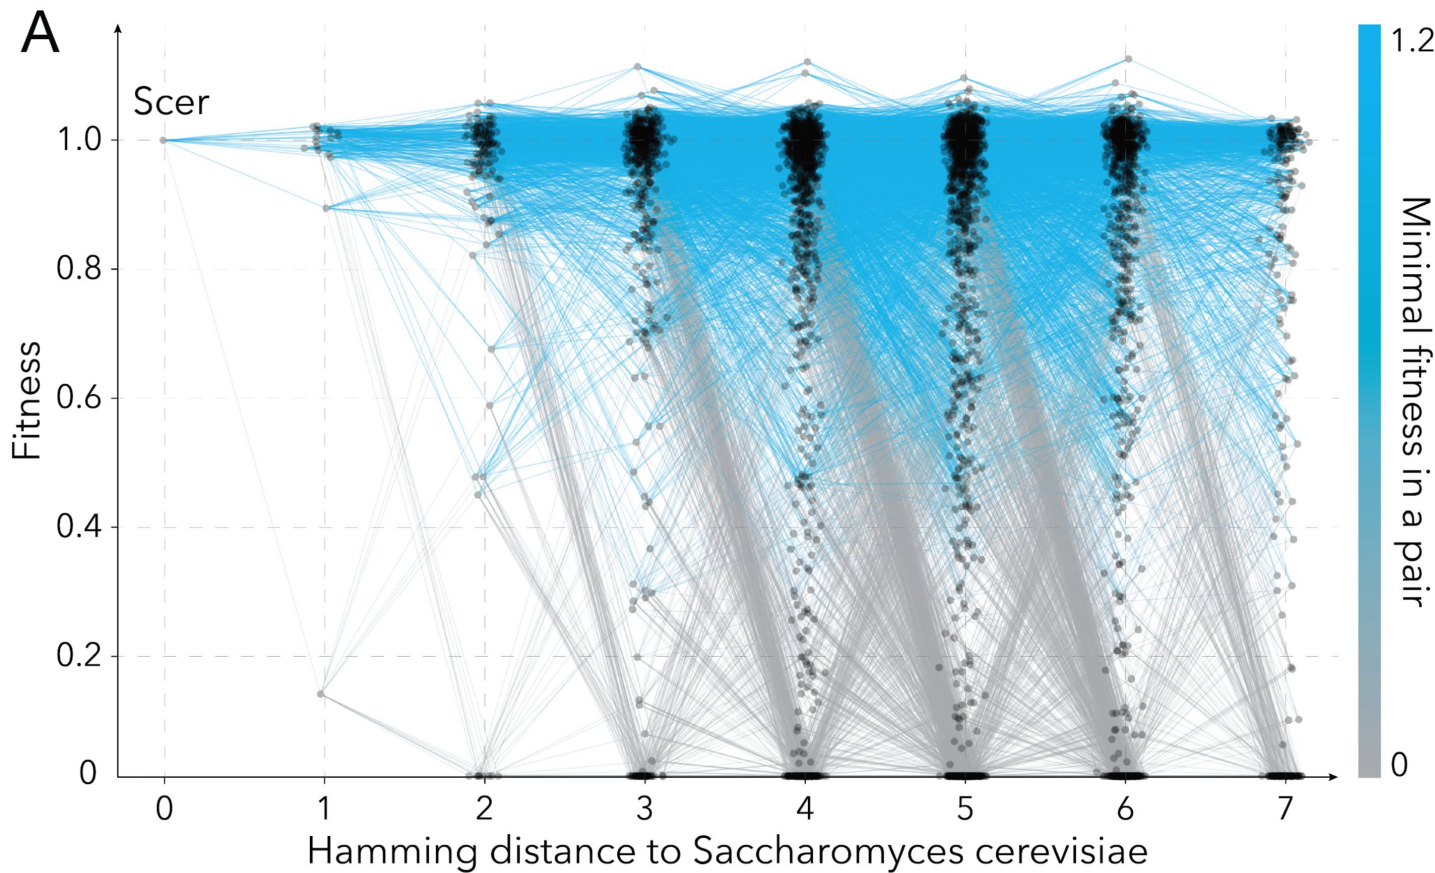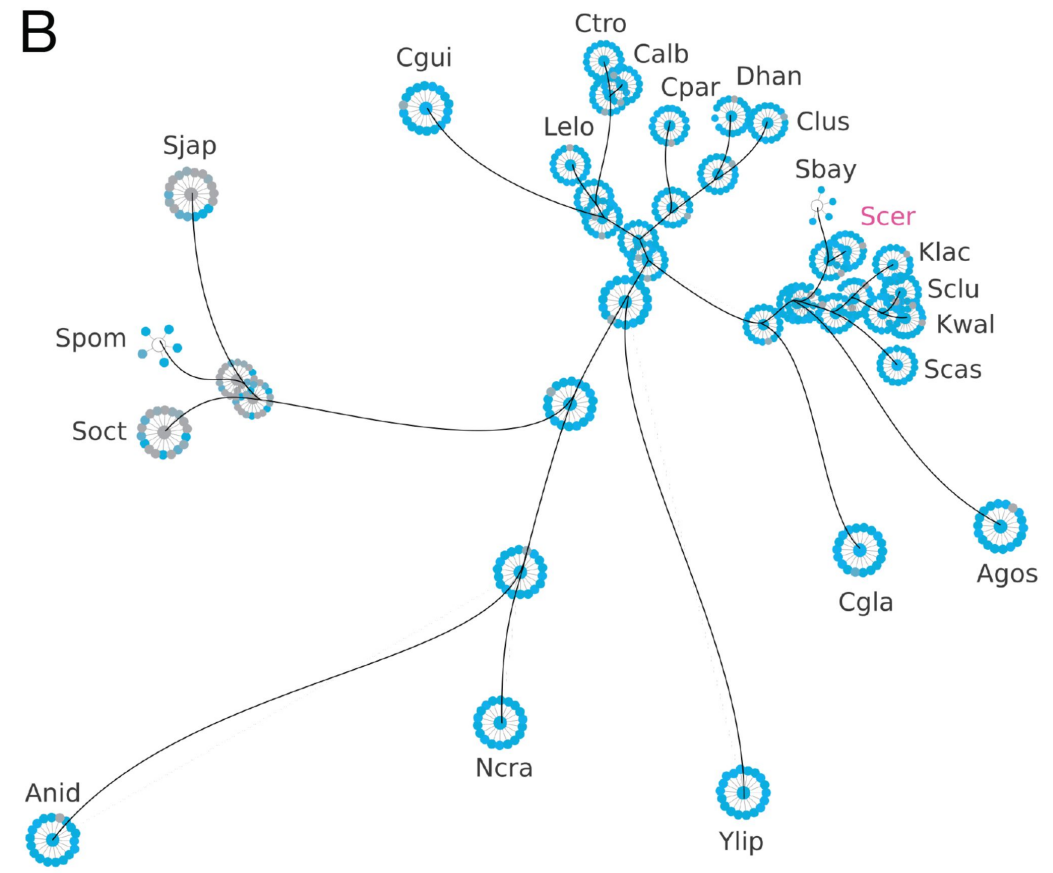

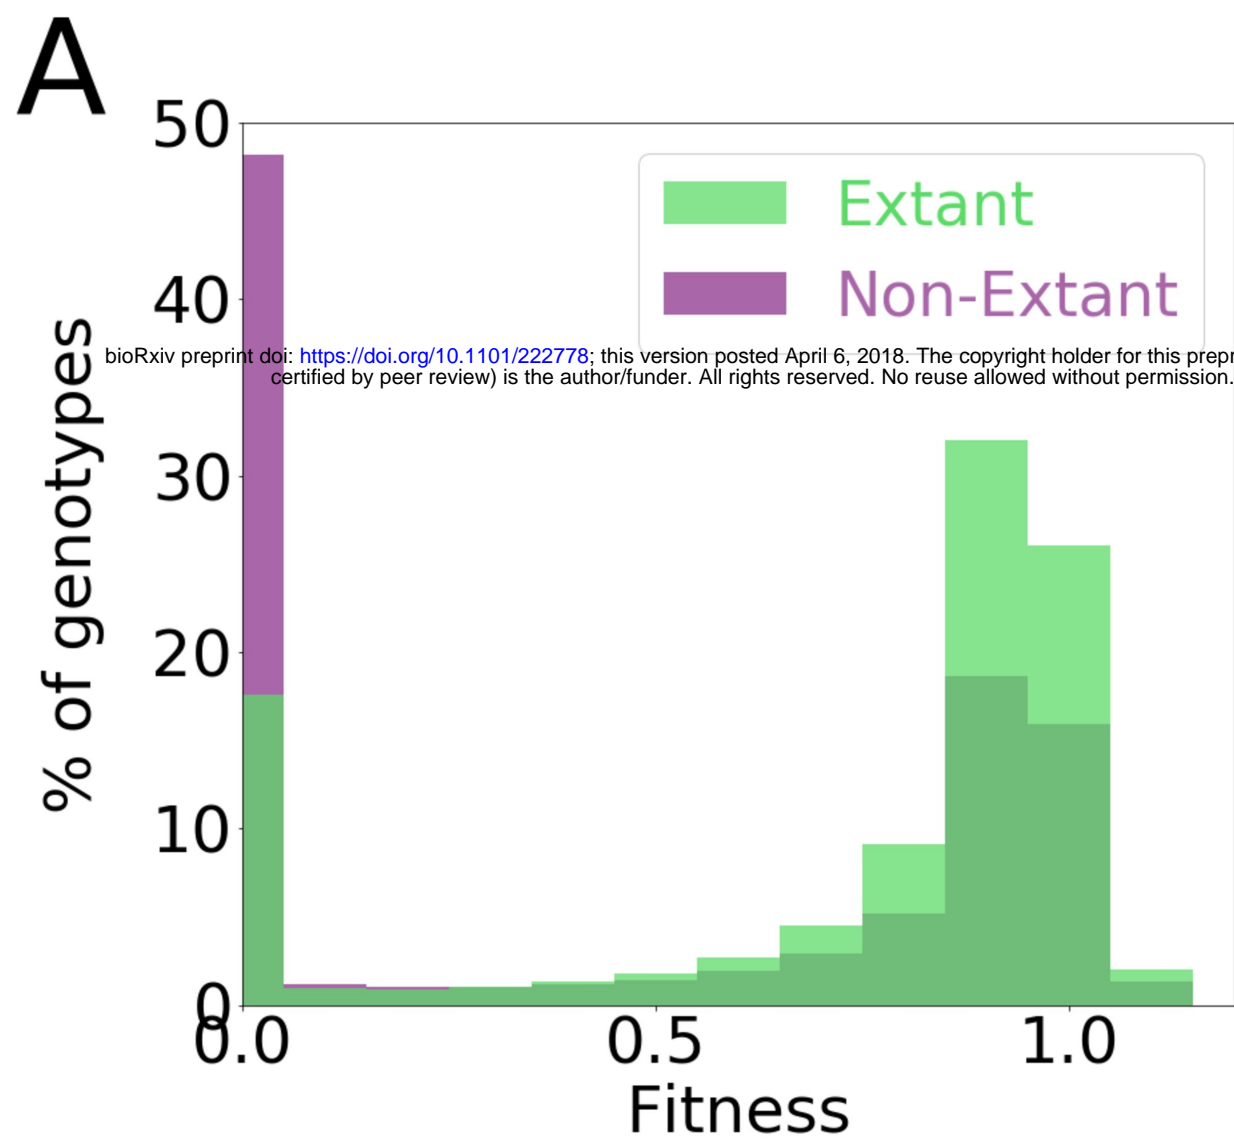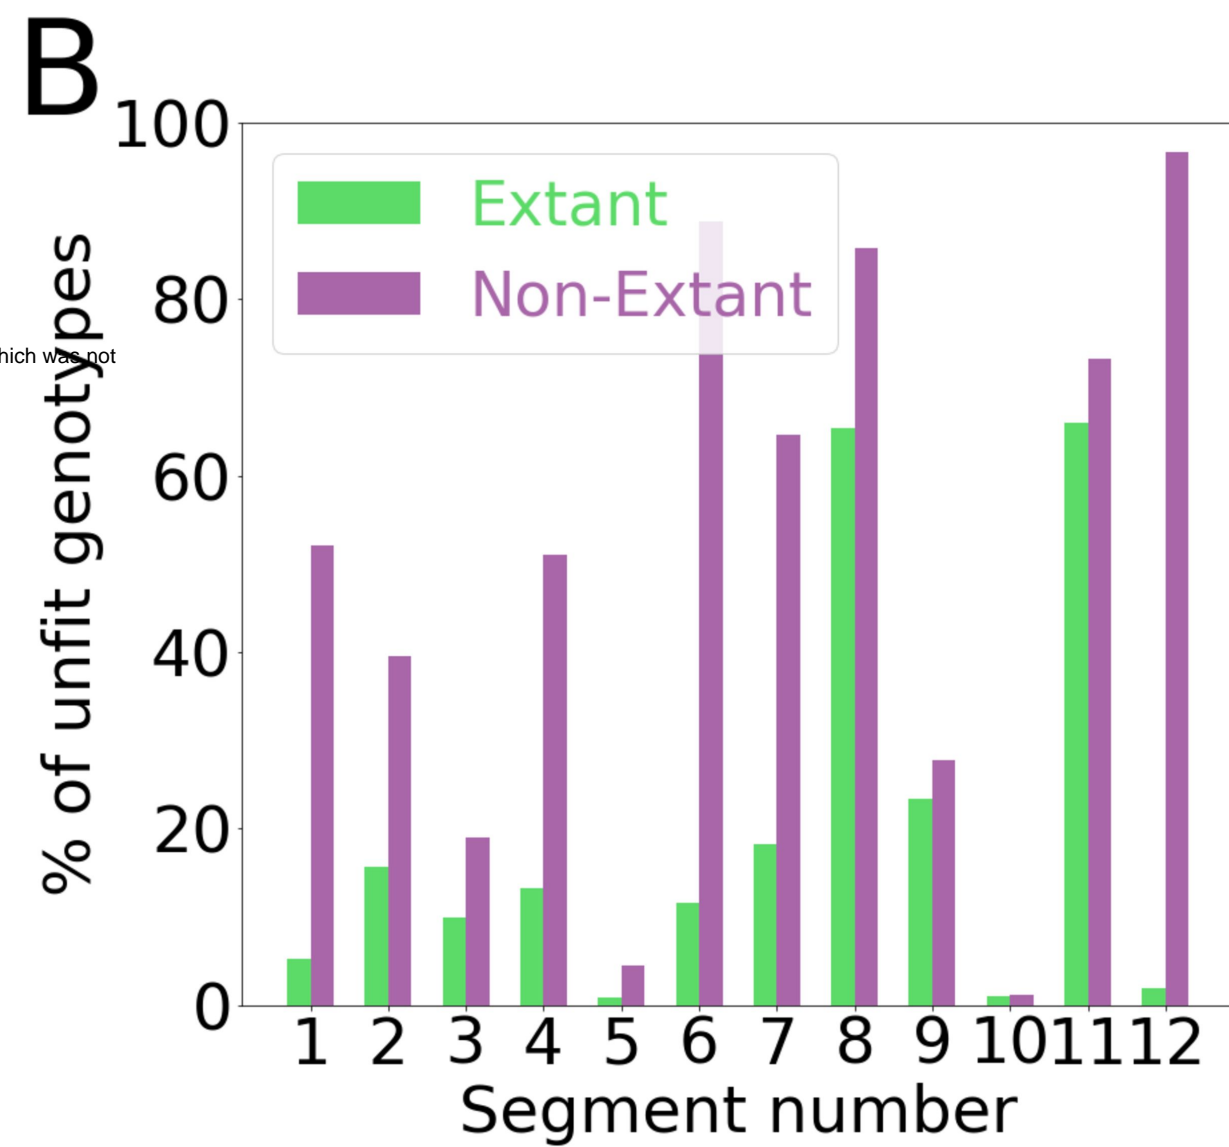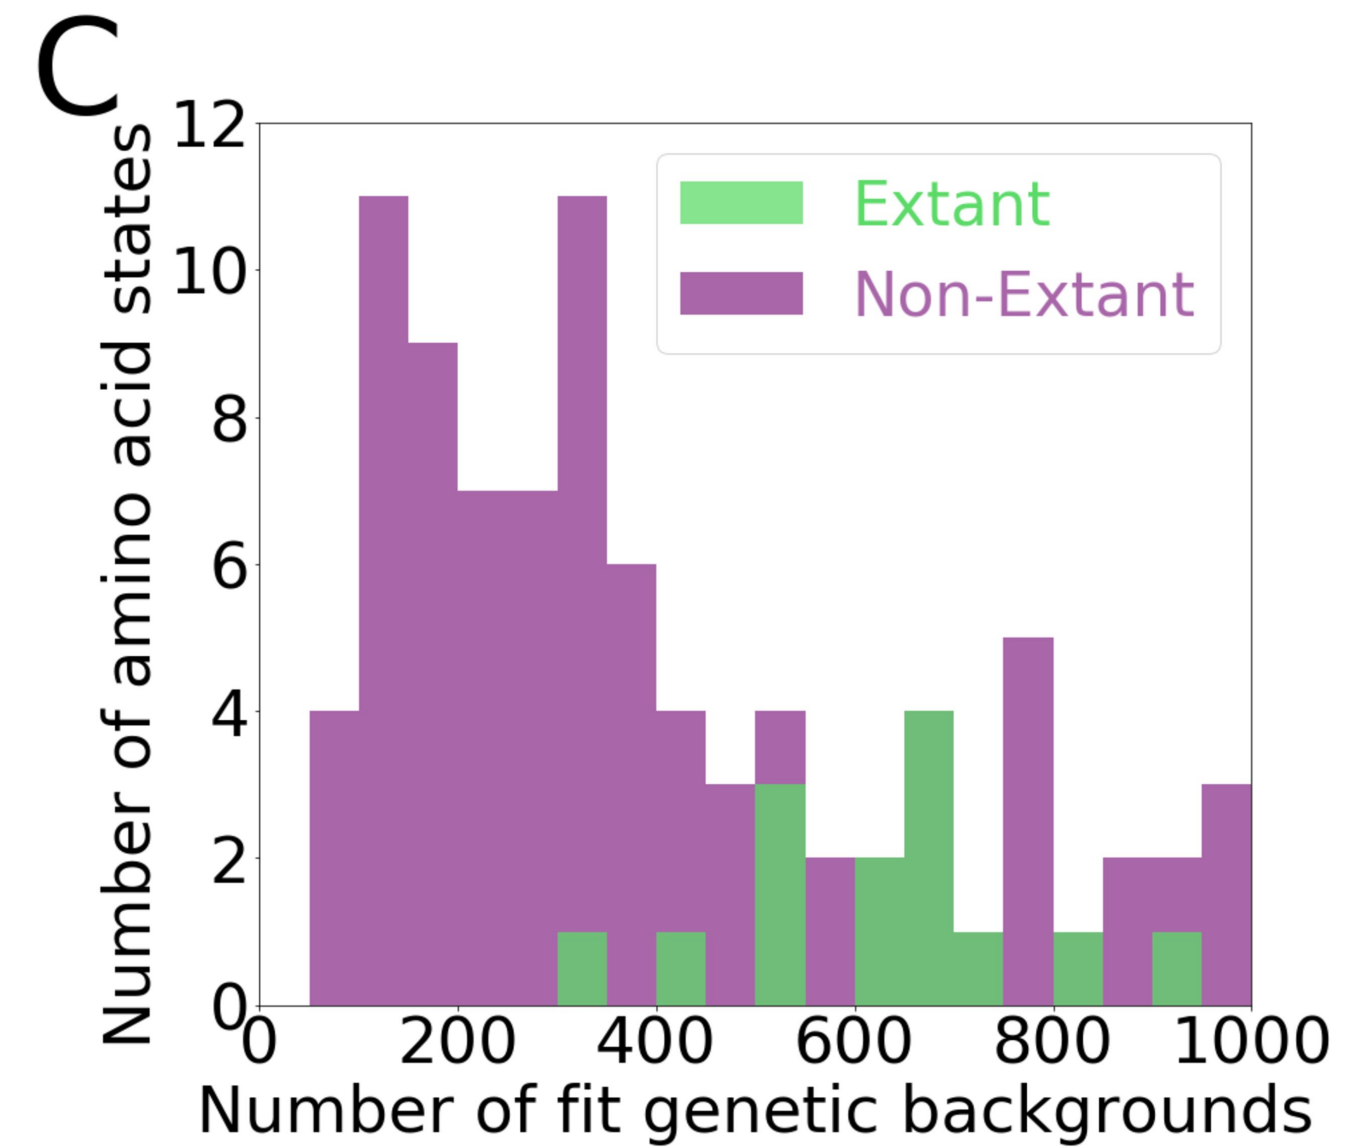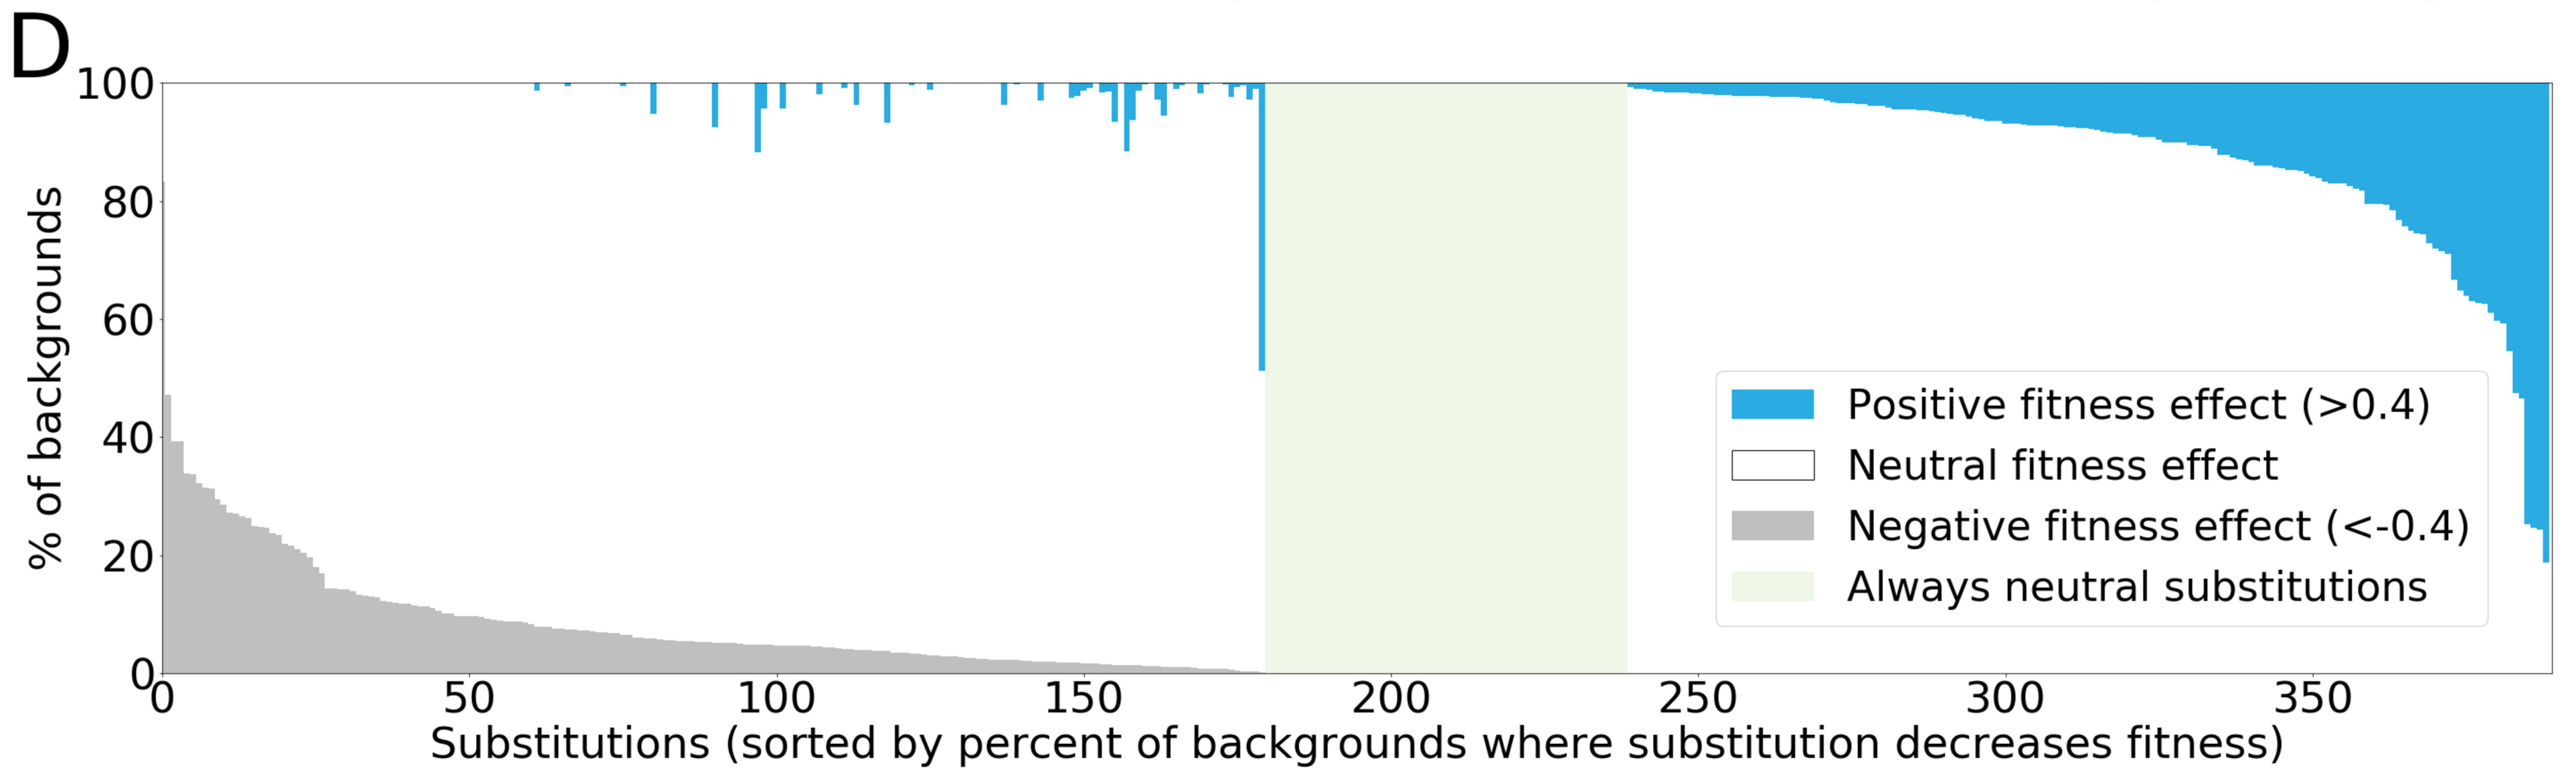

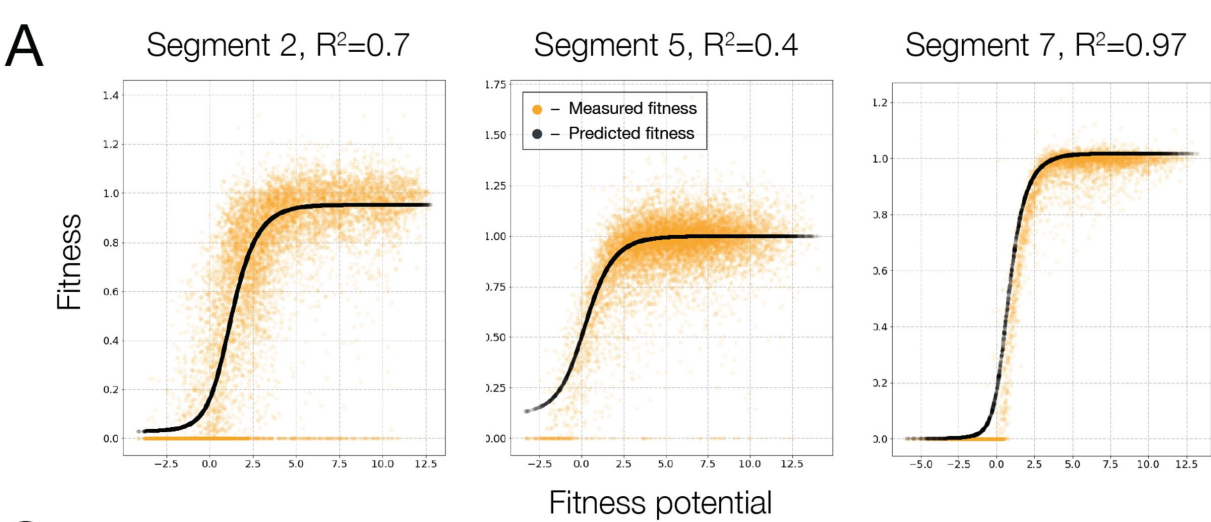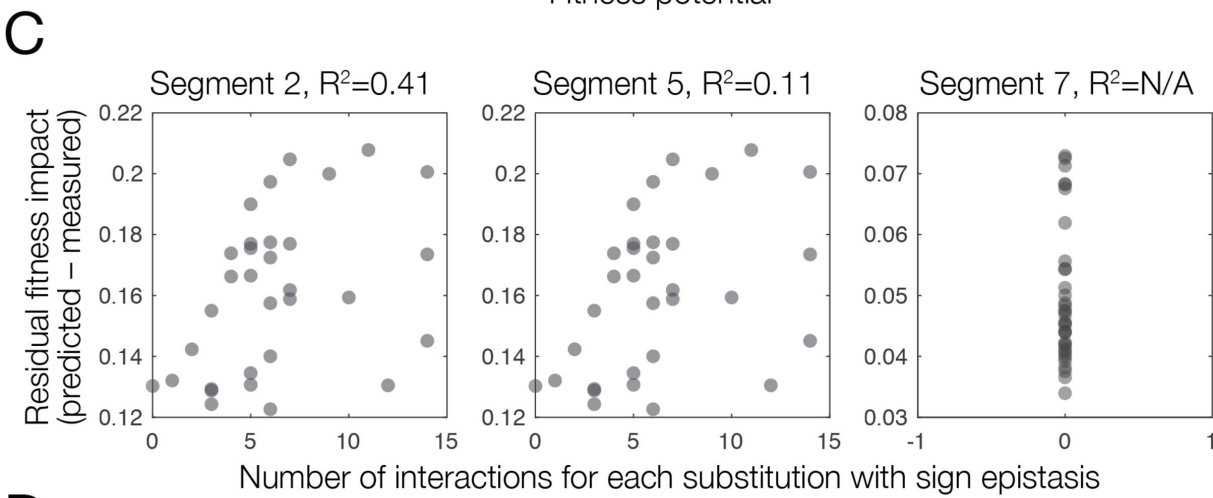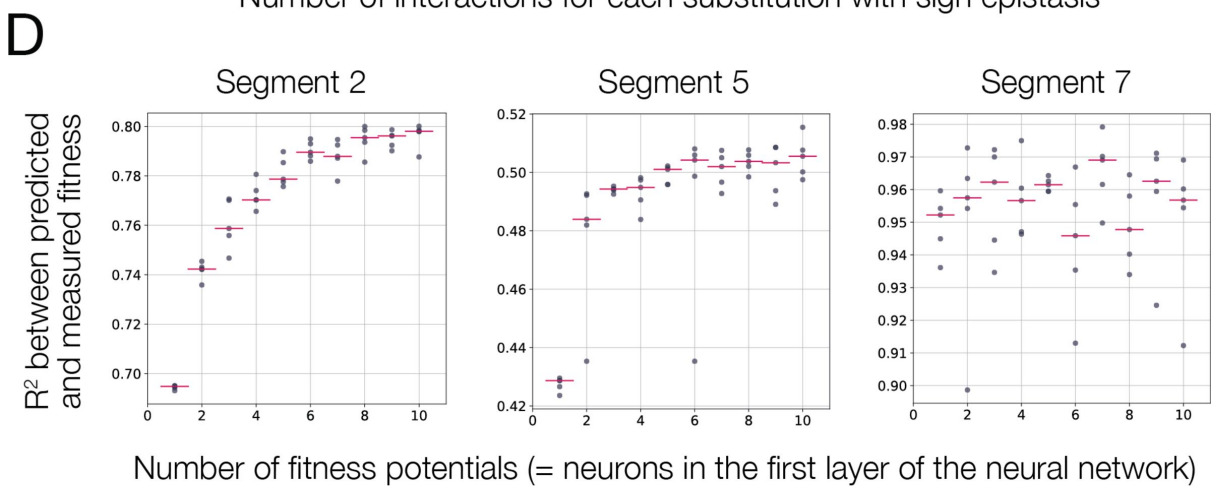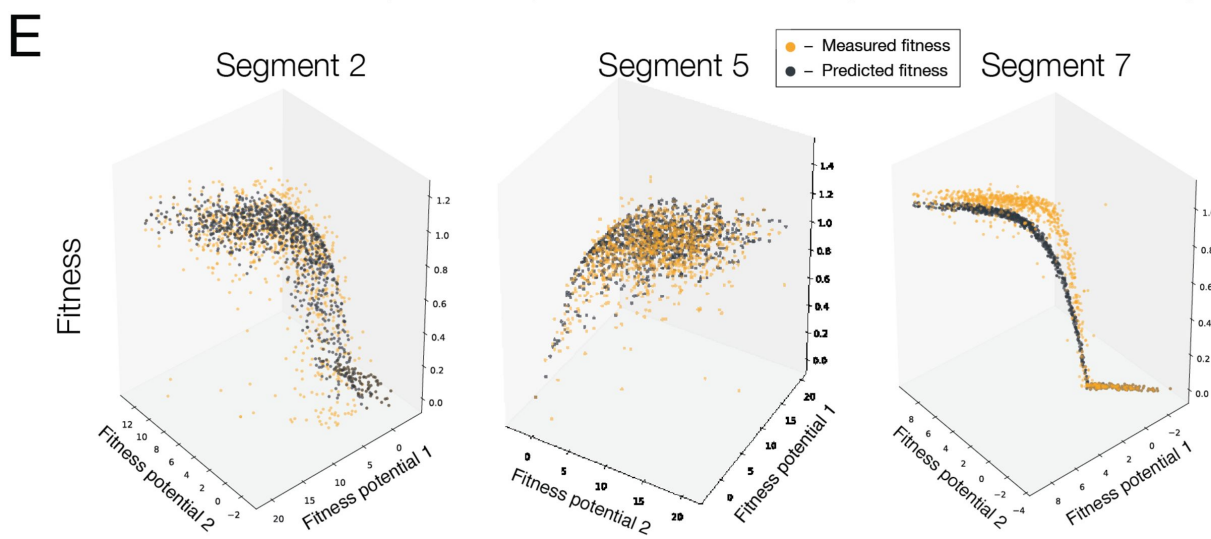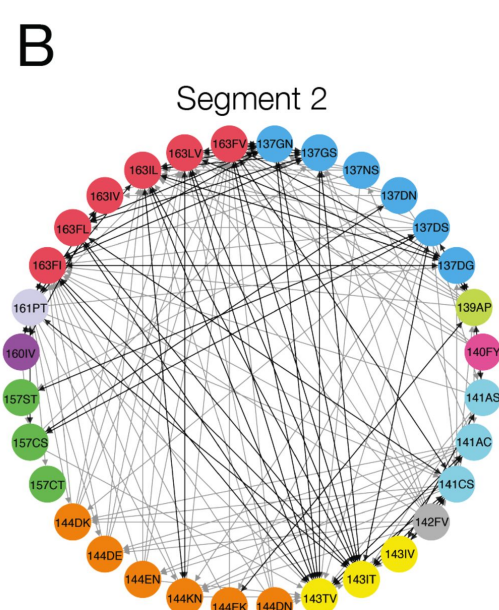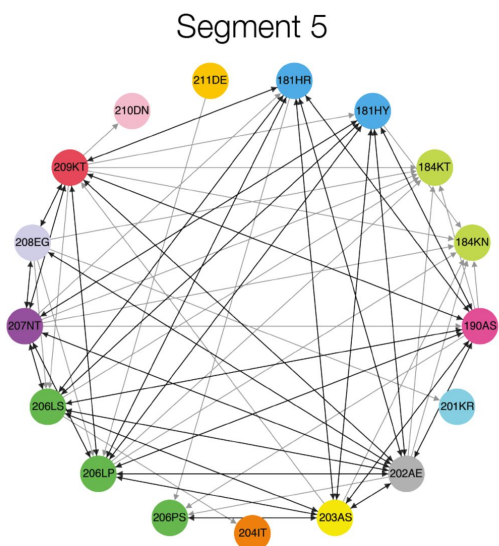

Segment 7

No sign epistasis detected

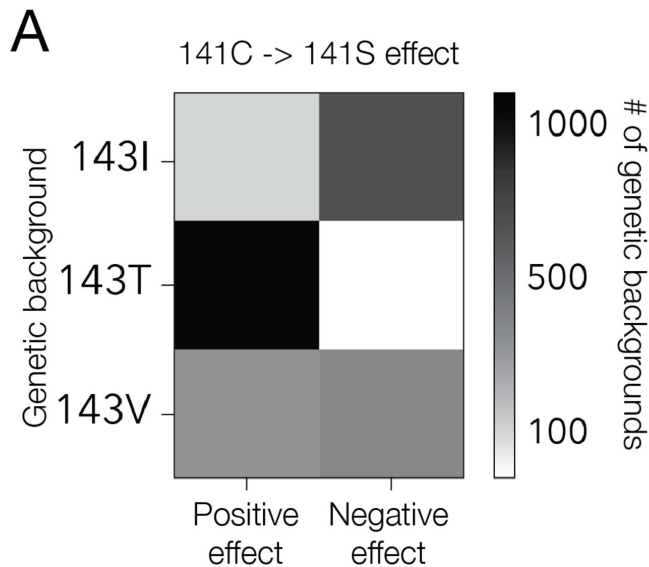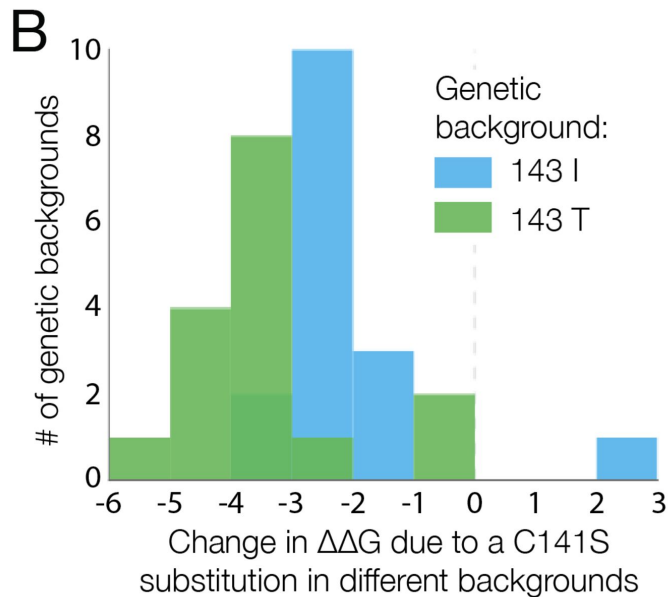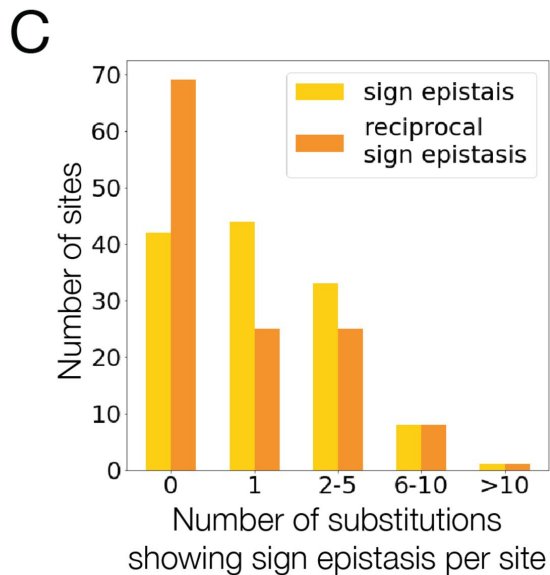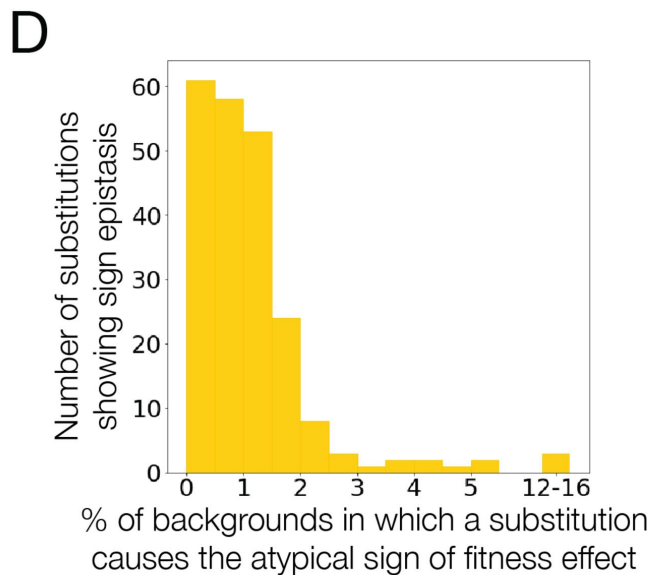



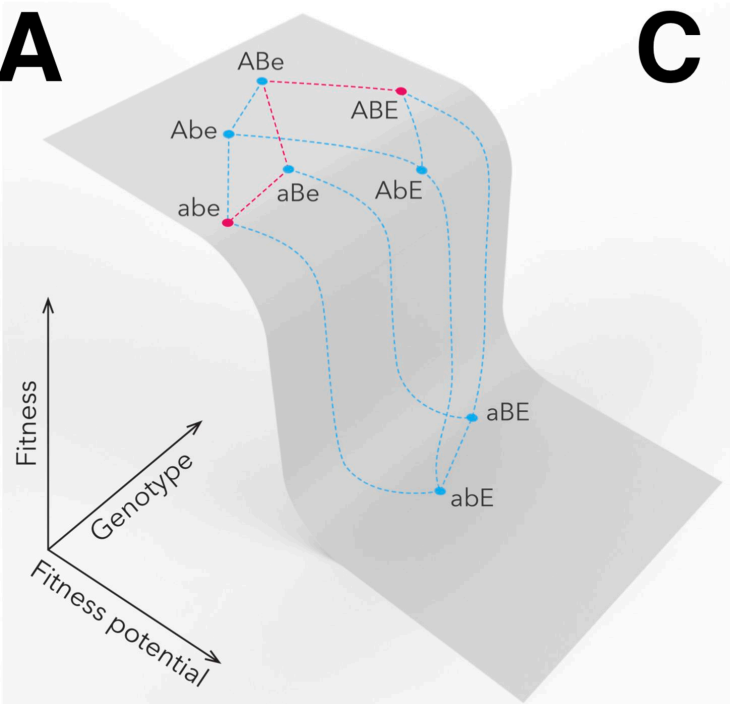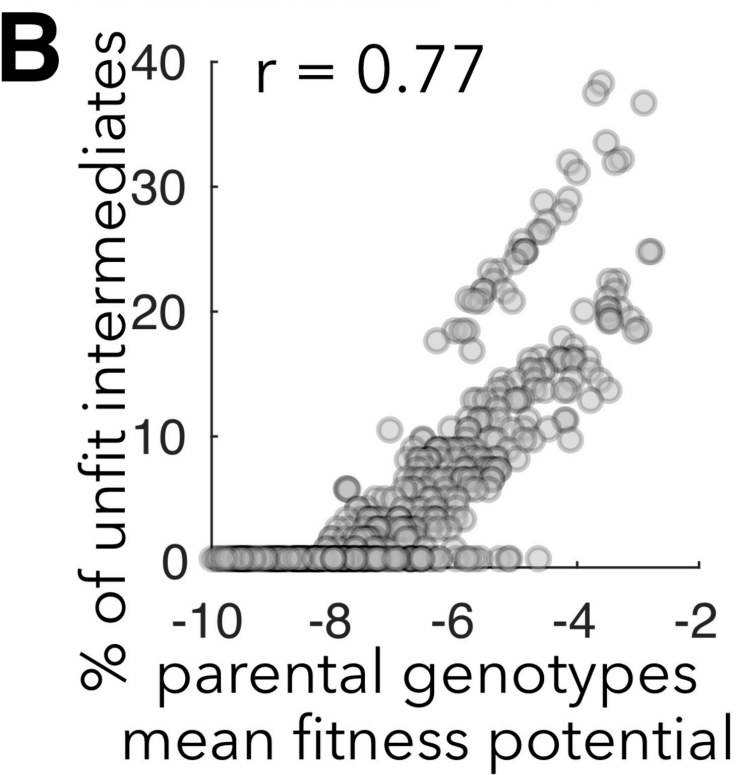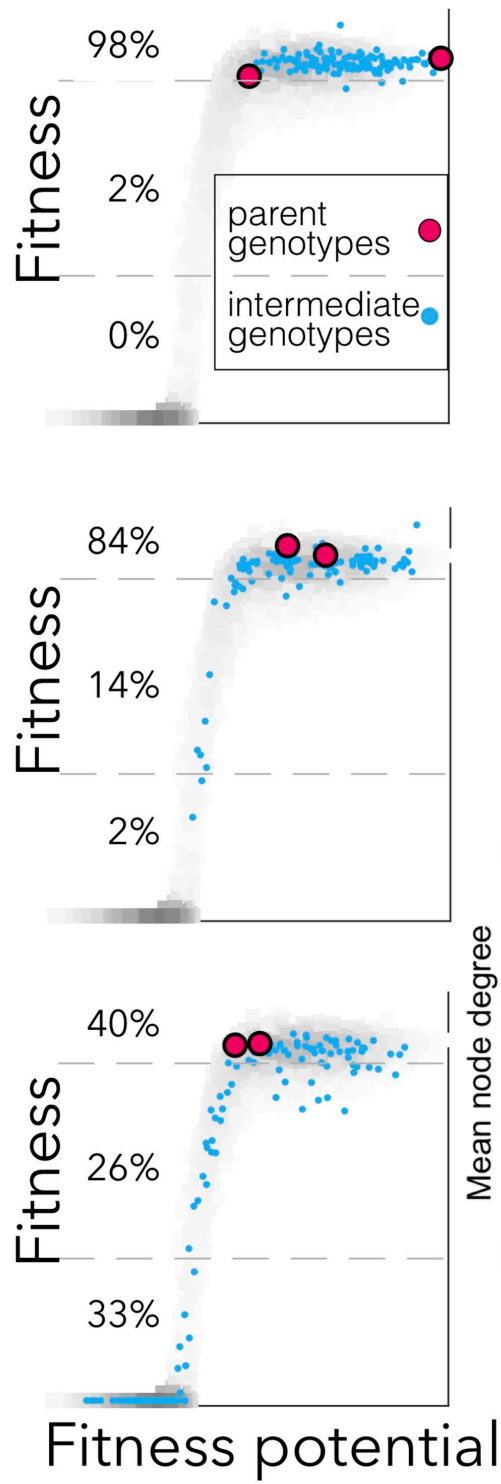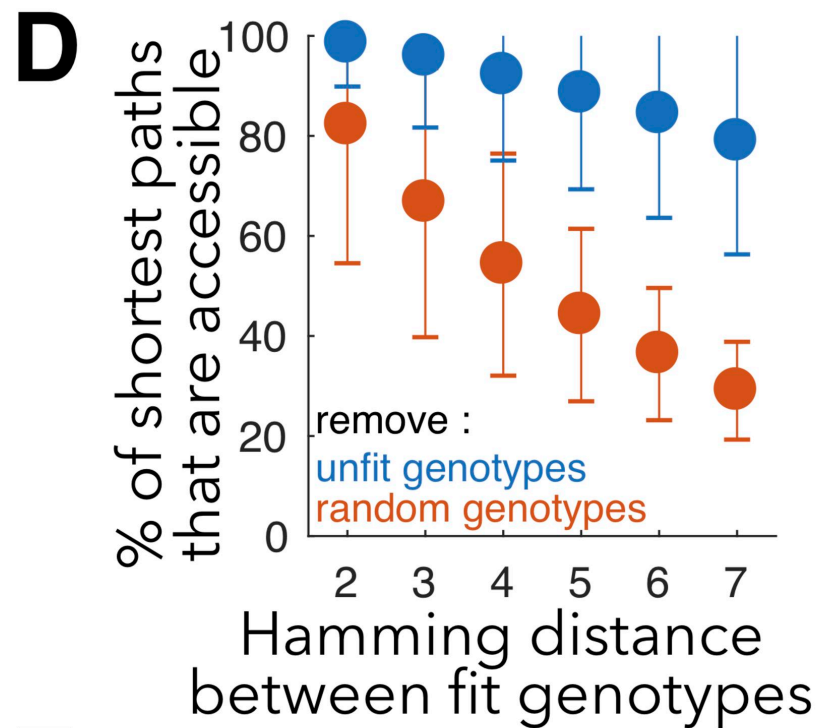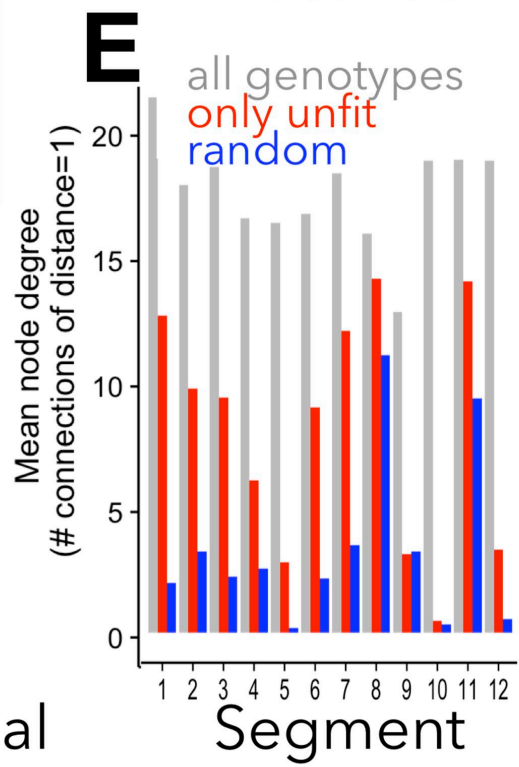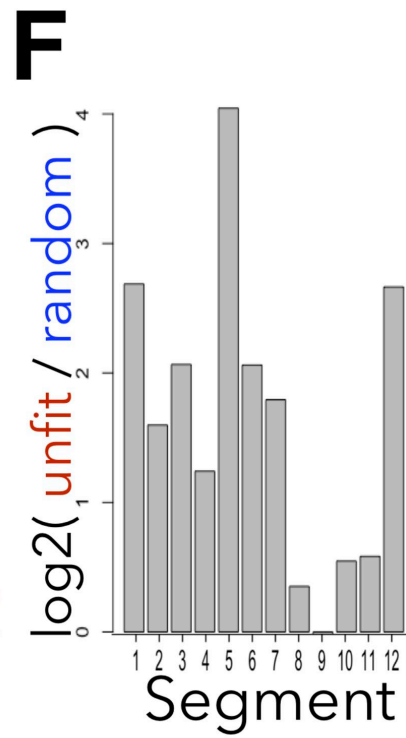

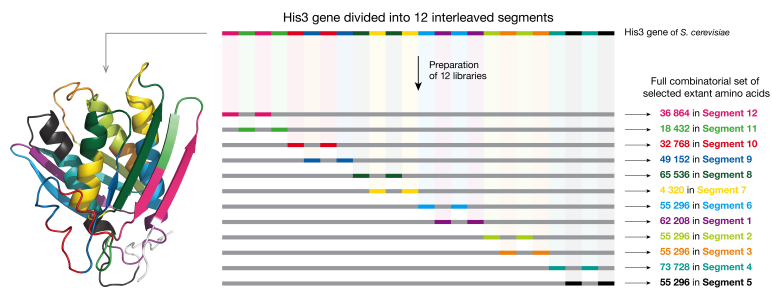

A

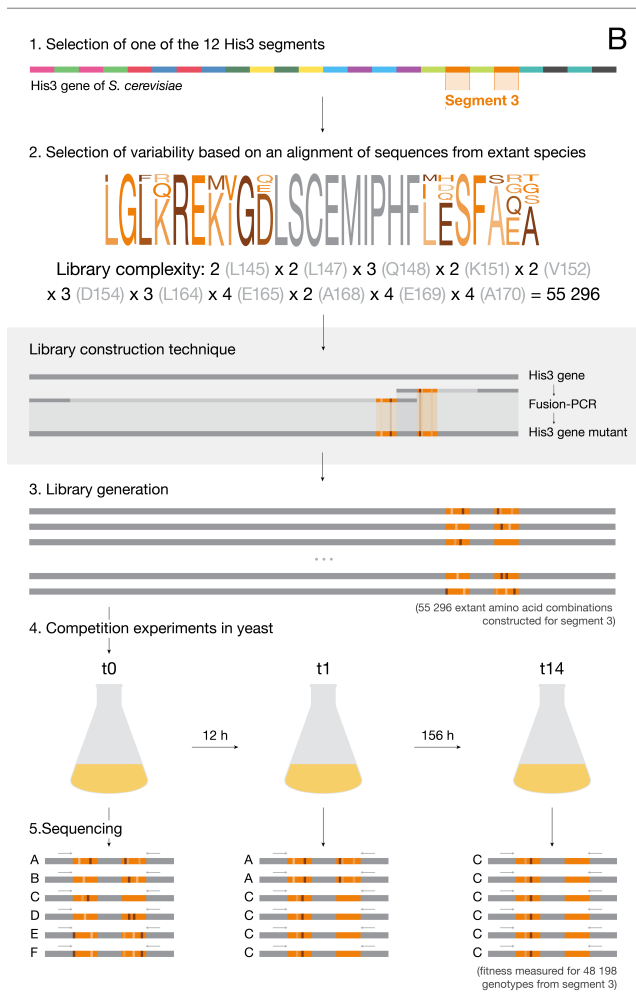

B

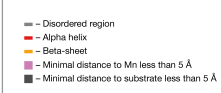

C

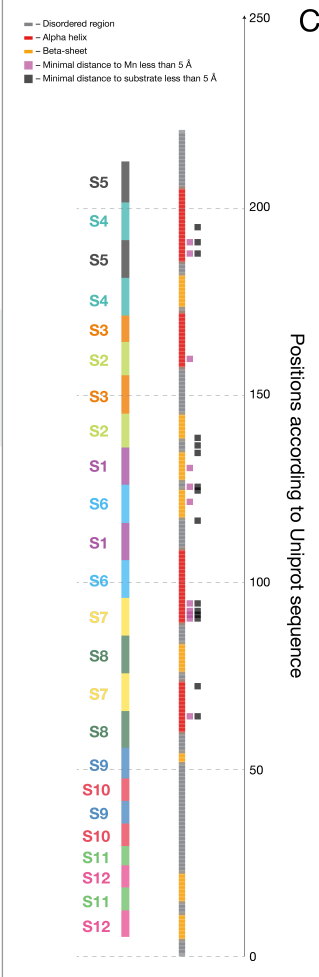

**A**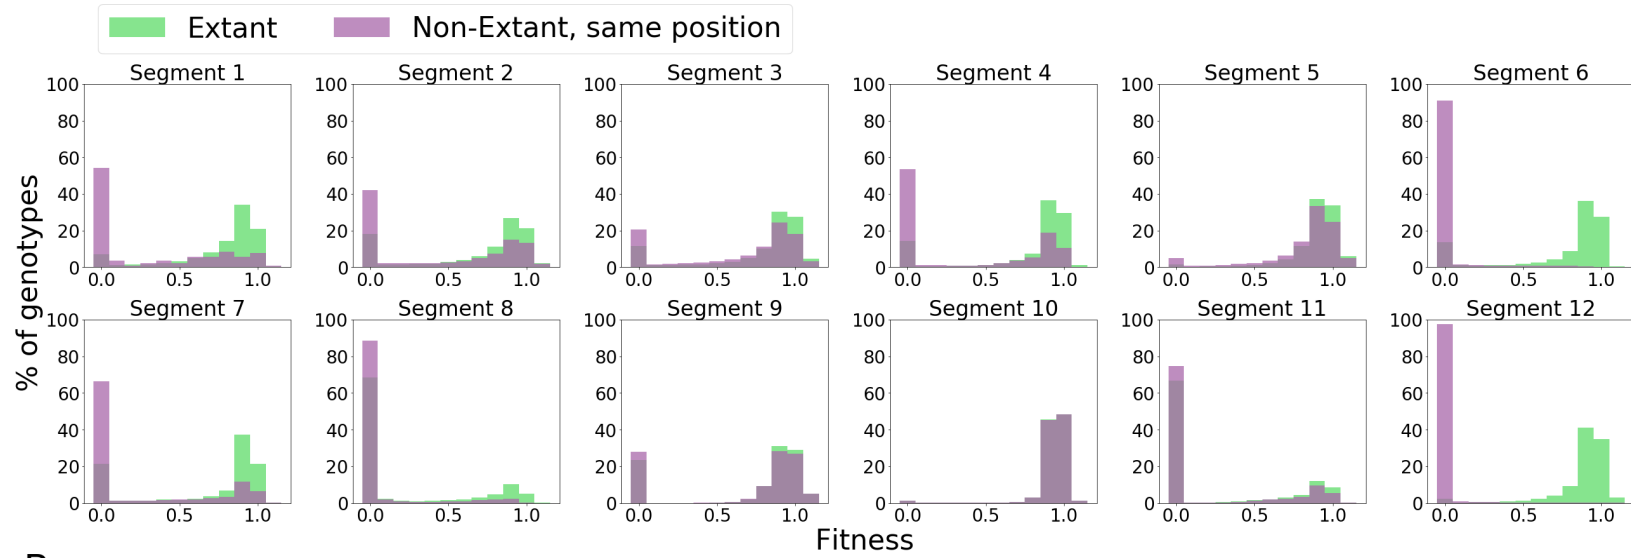**B**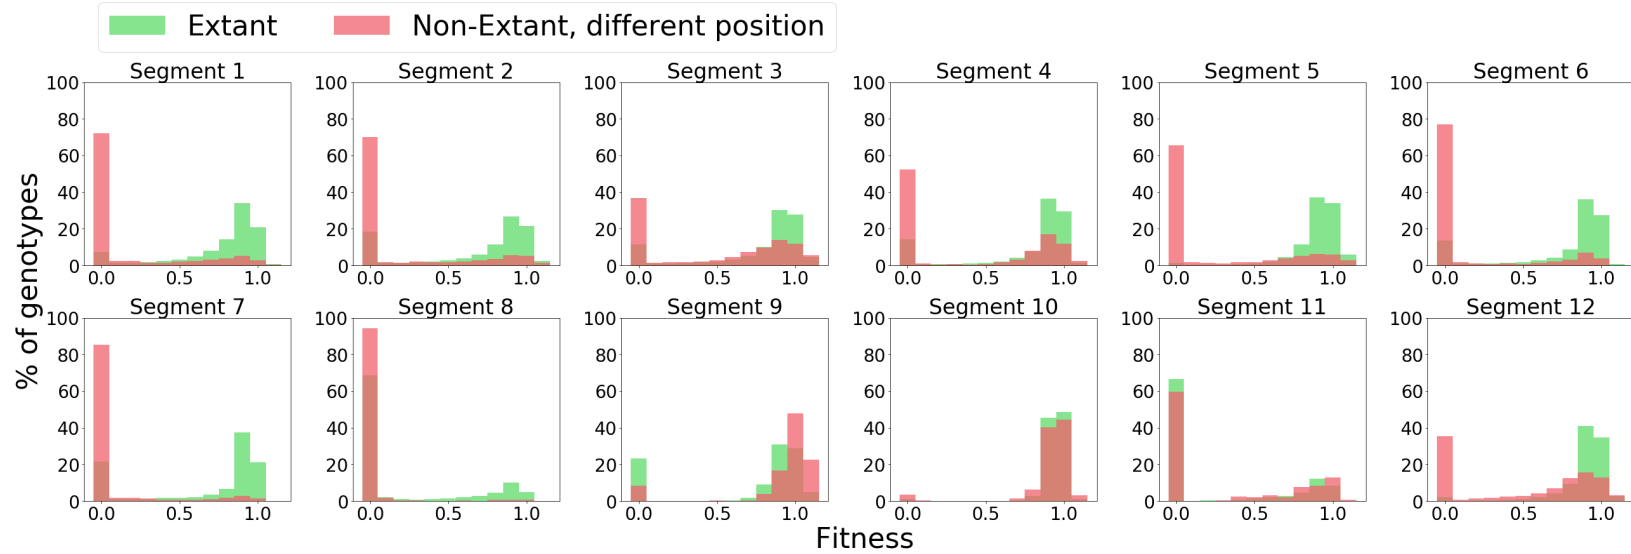

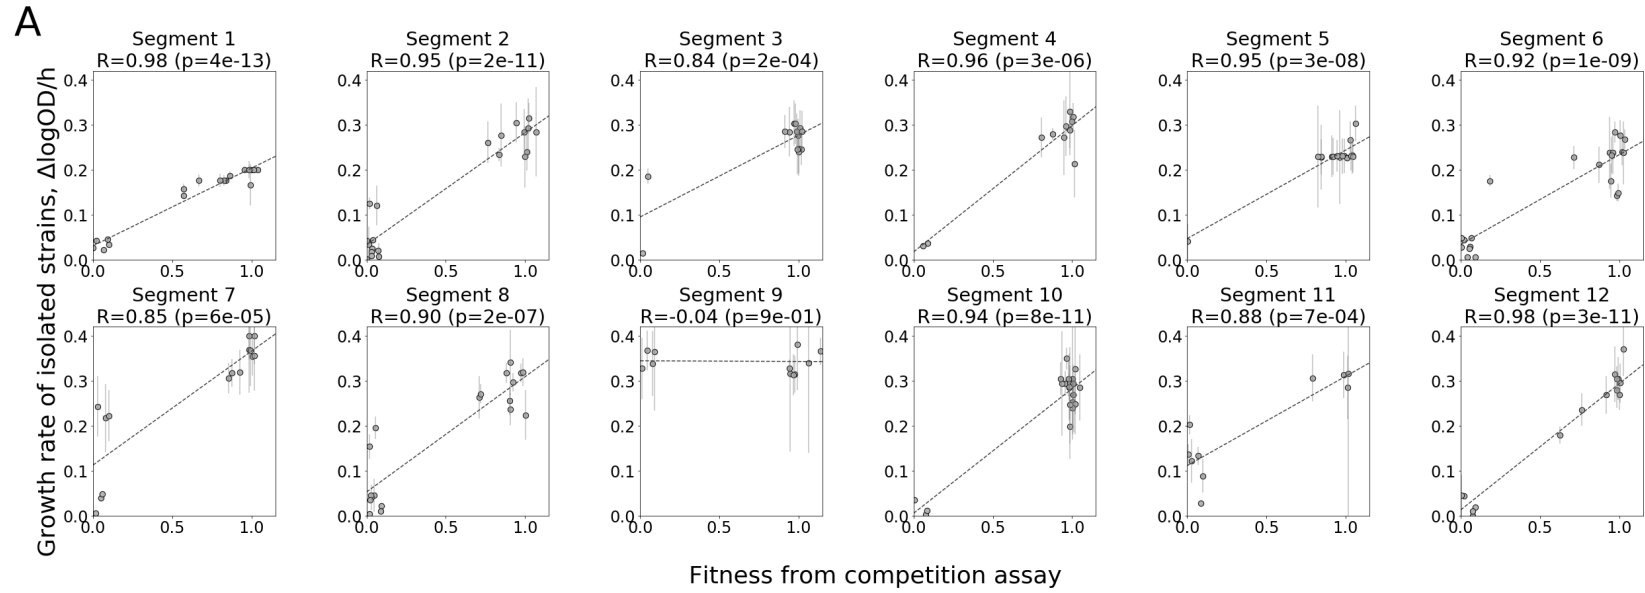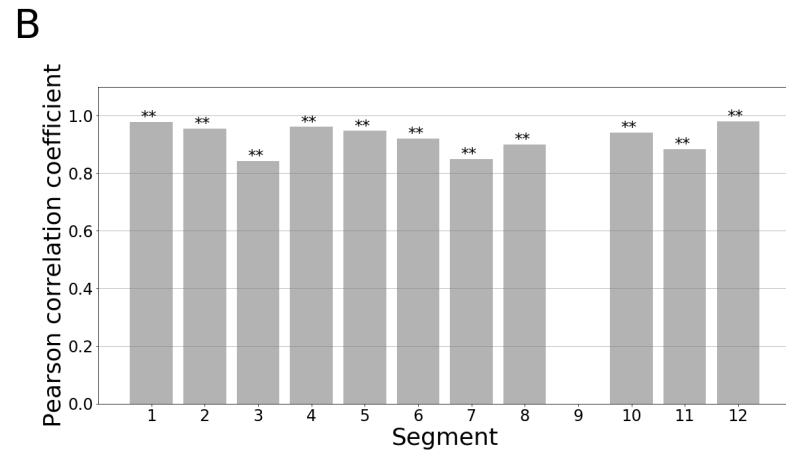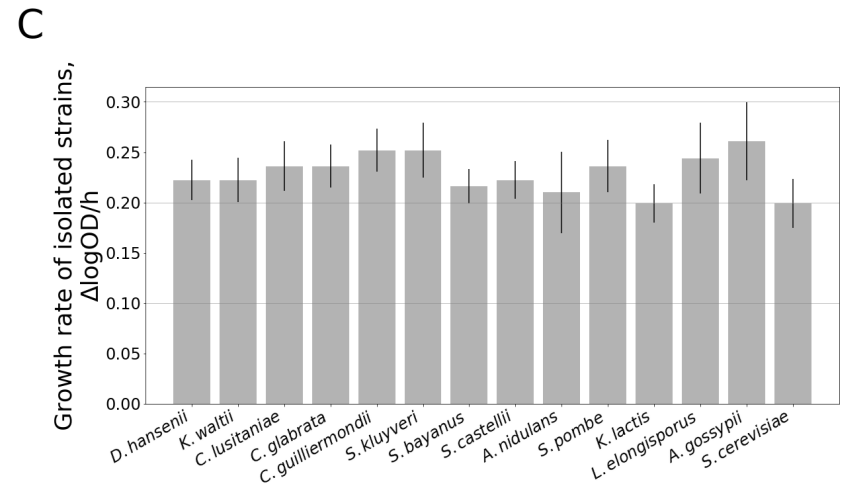

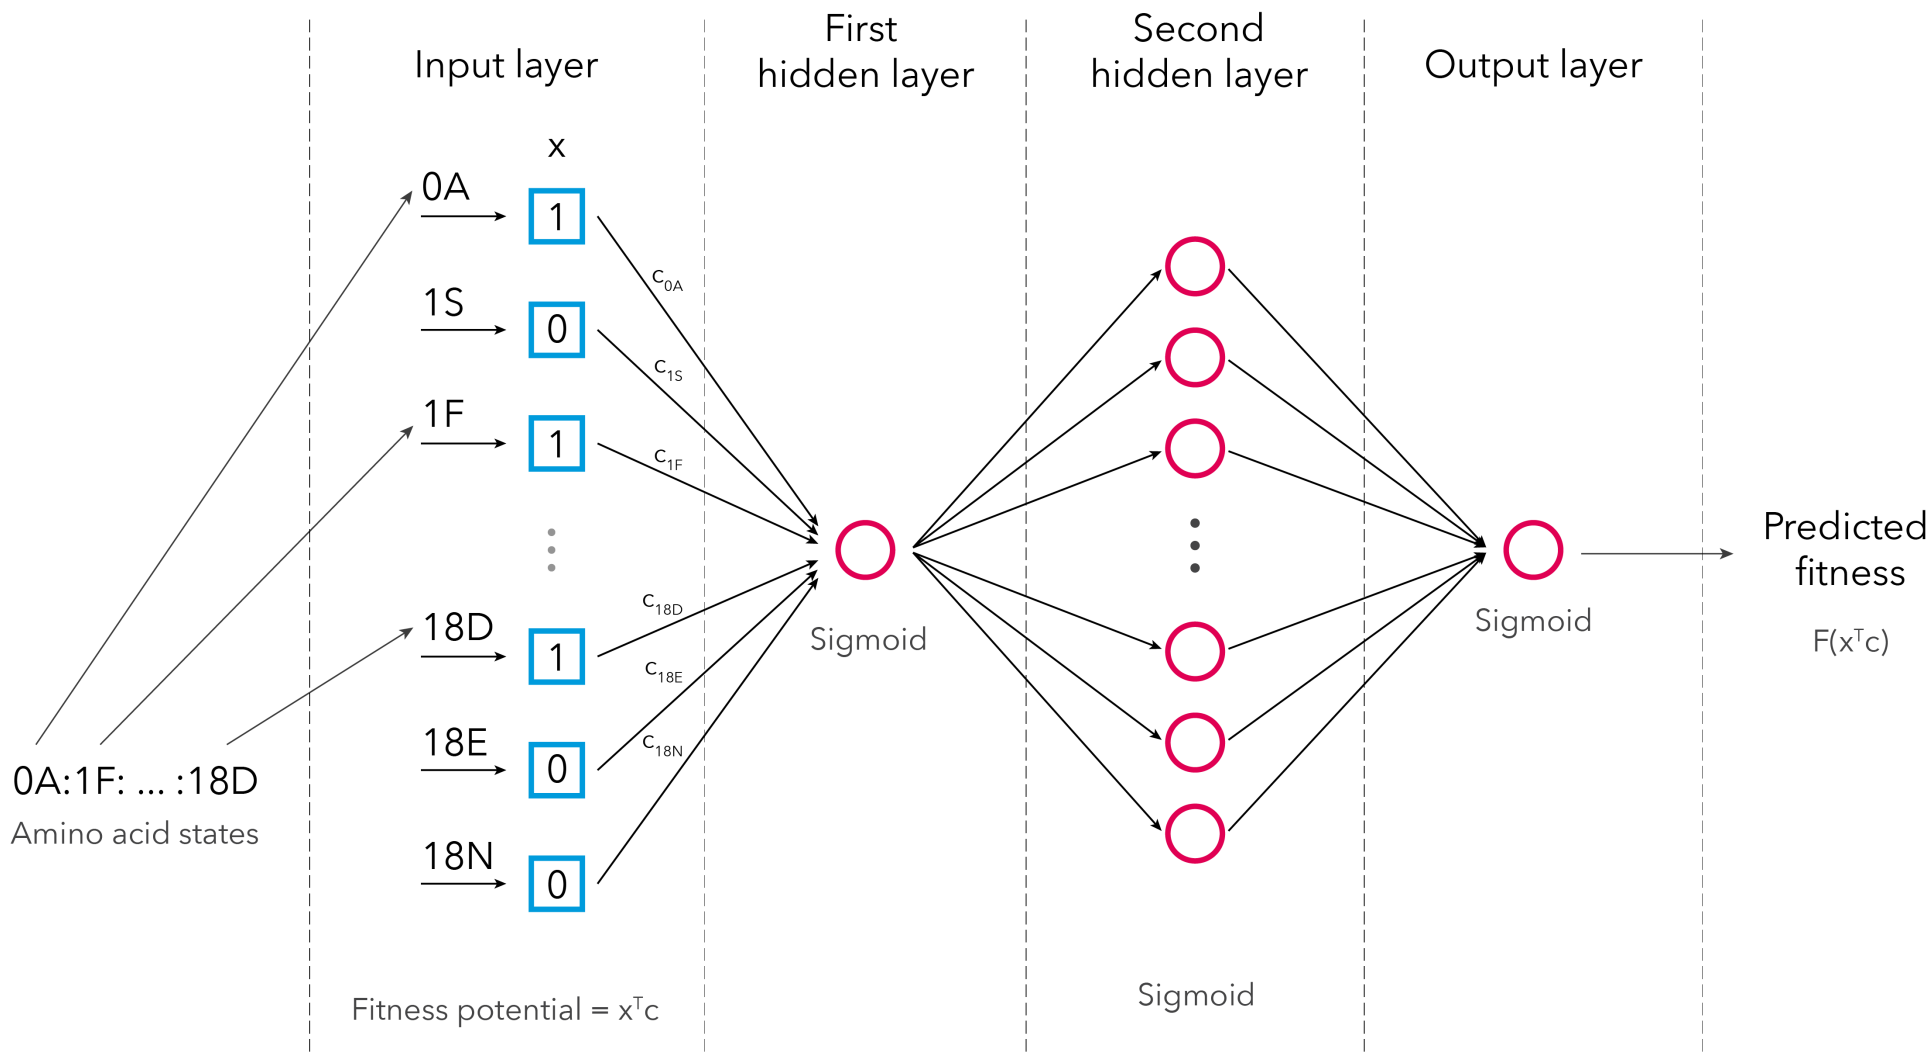

**A**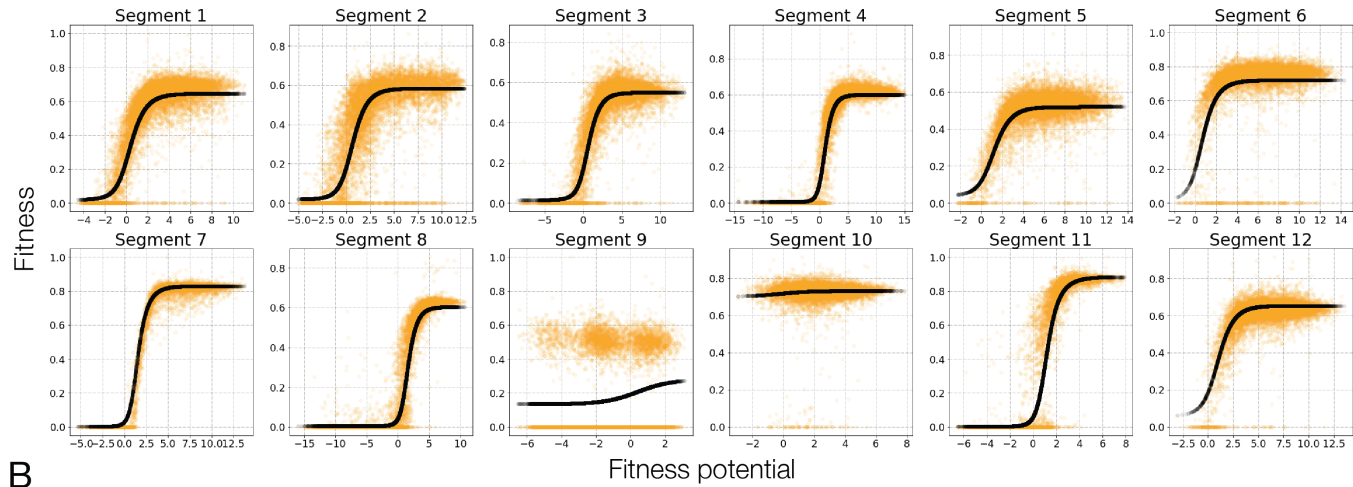**B**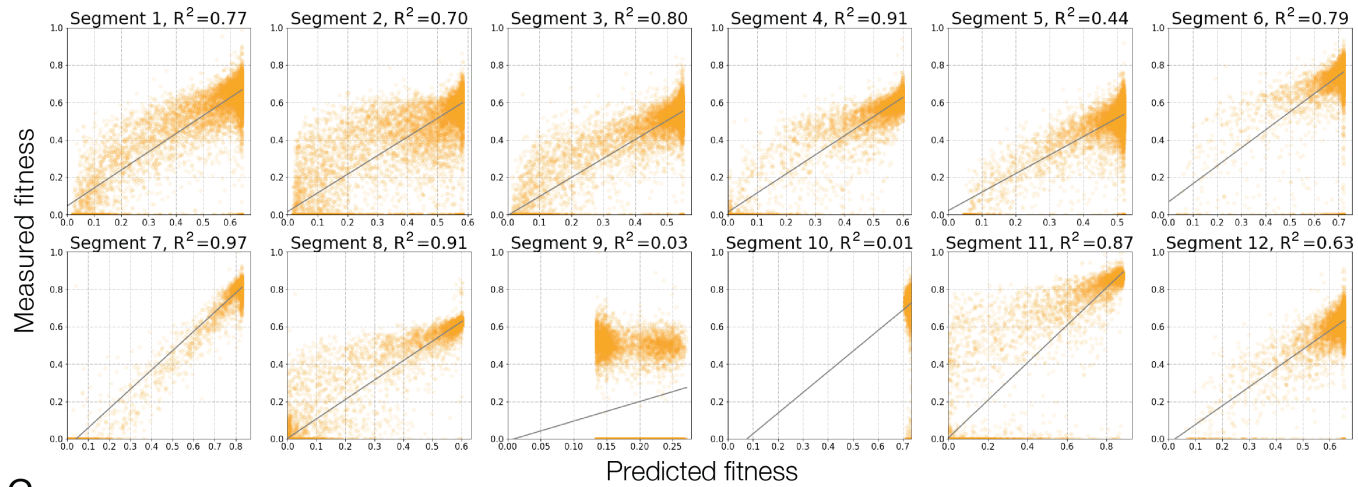**C**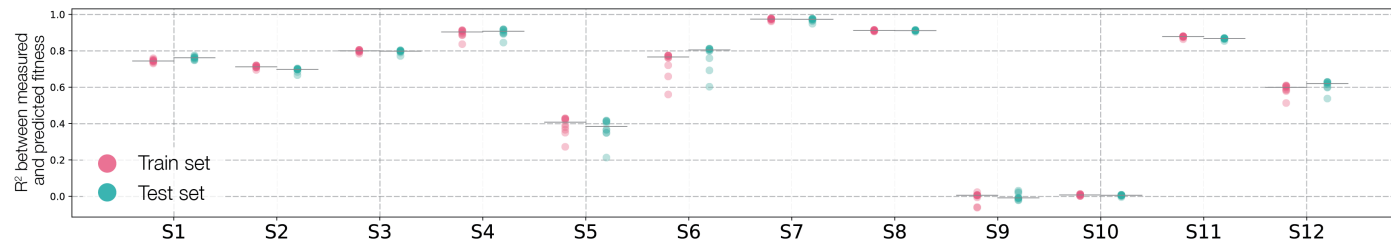

S1 (MCS 5)

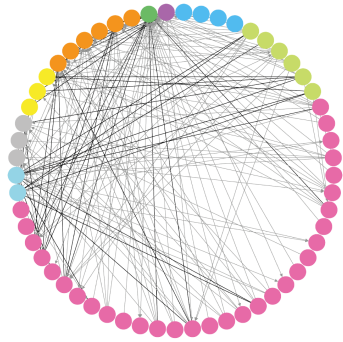

S2 (MCS 5)

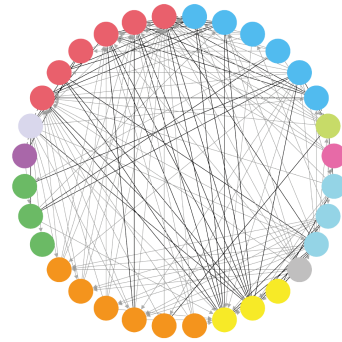

S3 (MCS 5)

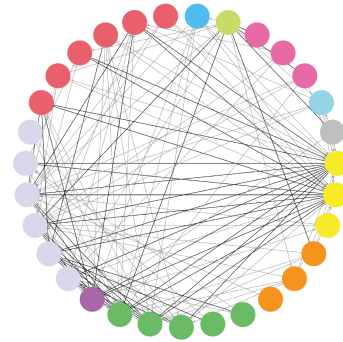

S4 (MCS 3)

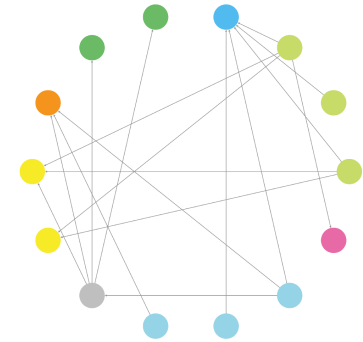

S5 (MCS 7)

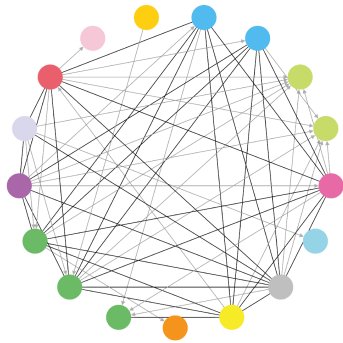

S6 (MCS 5)

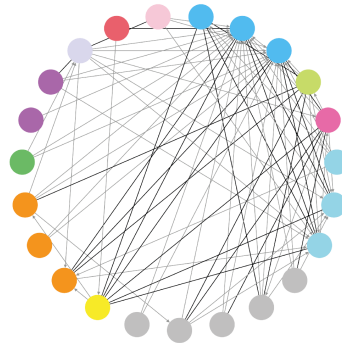

S7

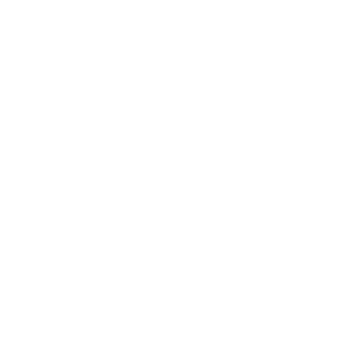

S8 (MCS 3)

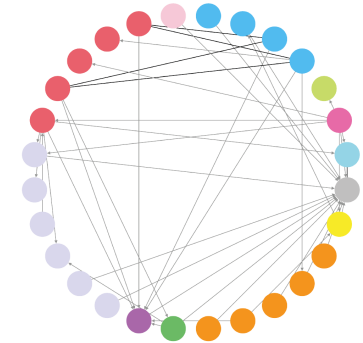

S9 (MCS 2)

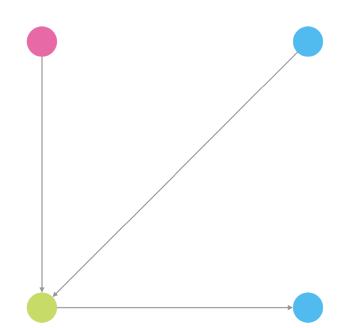

S10

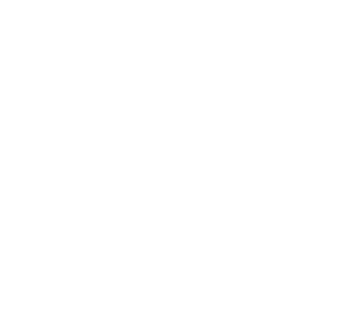

S11 (MCS 4)

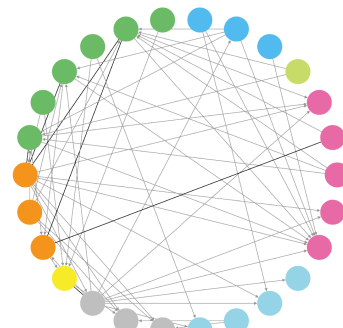

S12 (MCS 4)

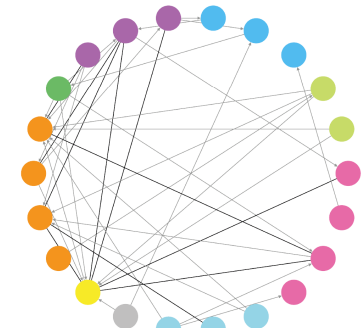

**A**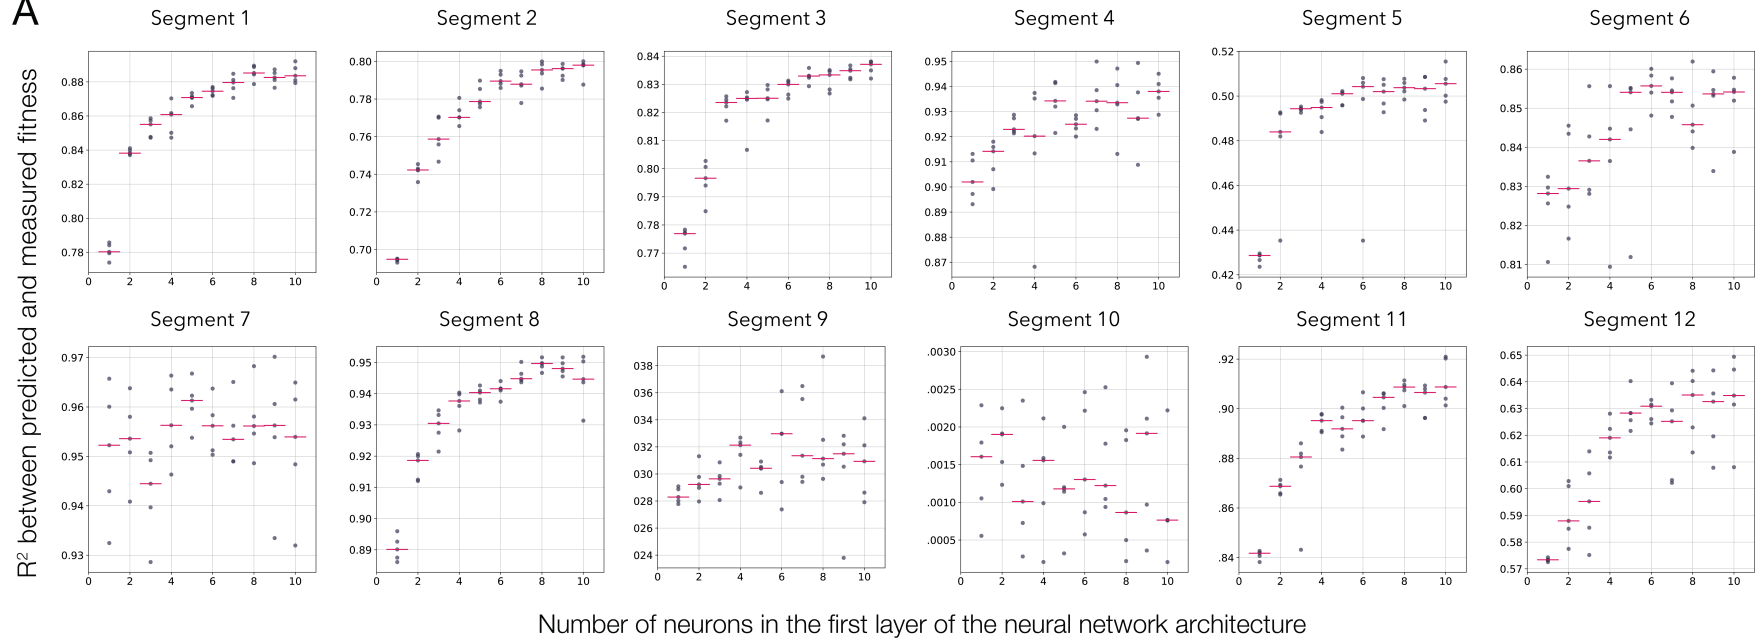**B**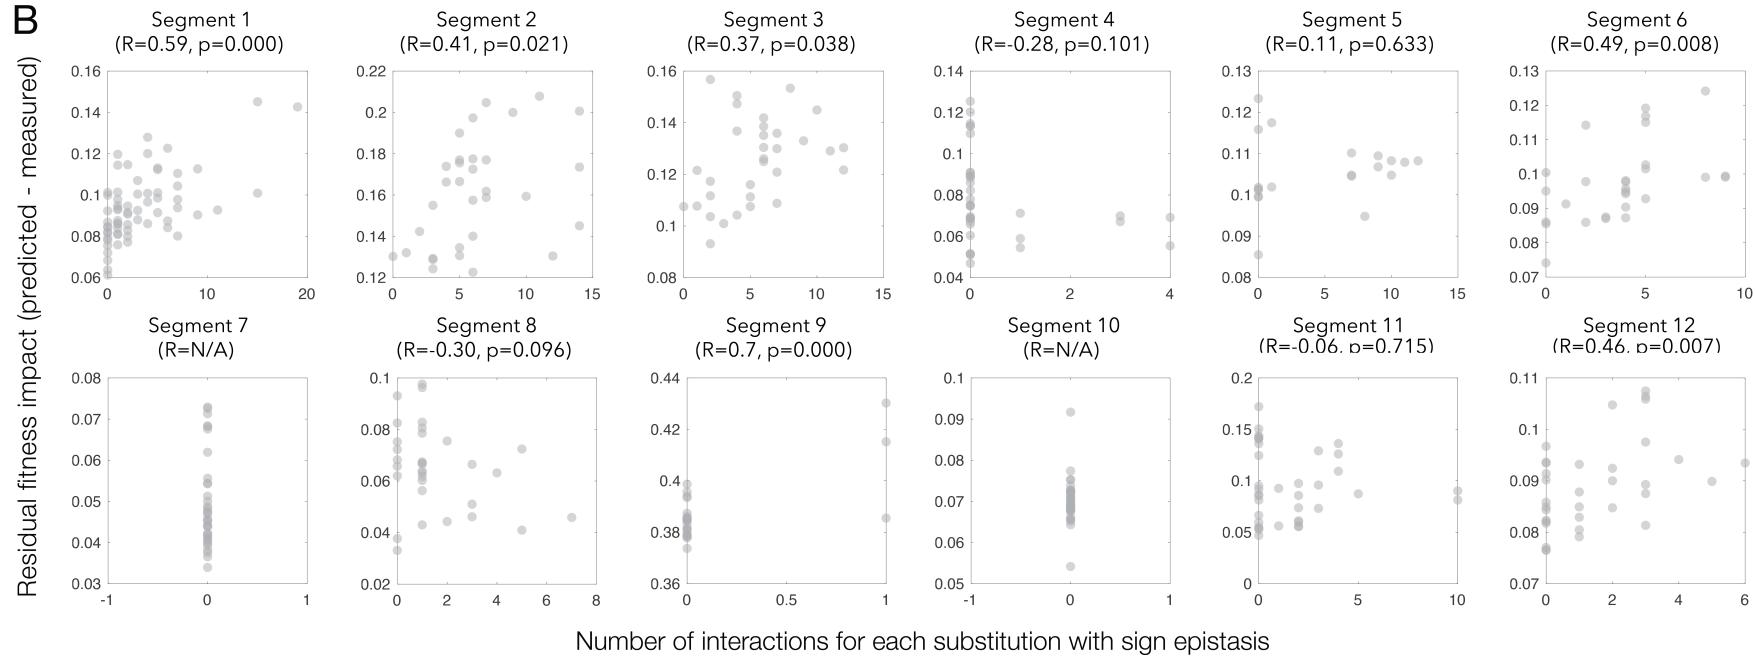



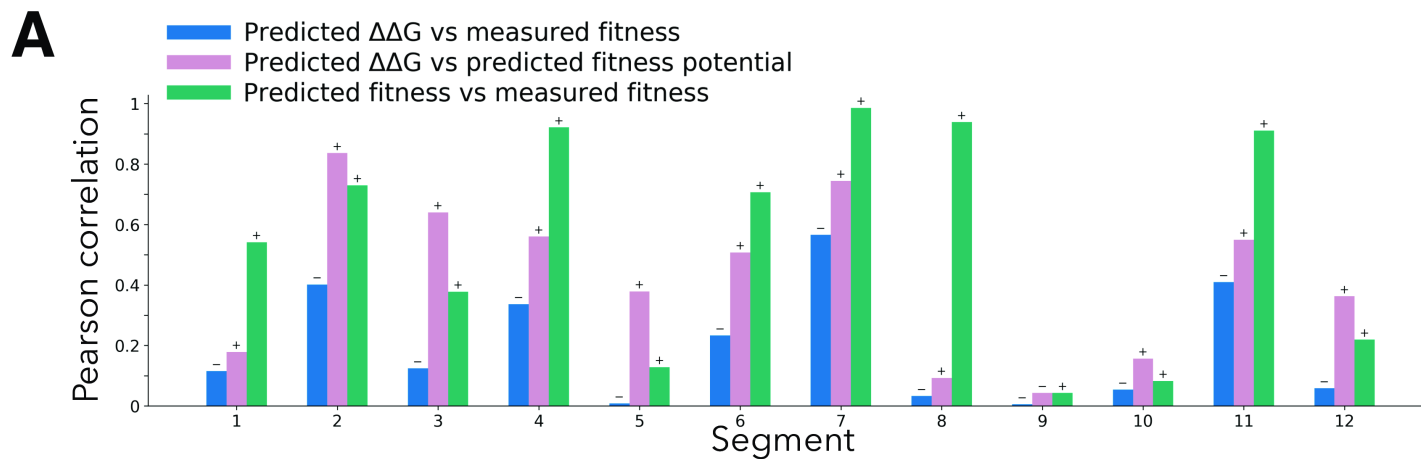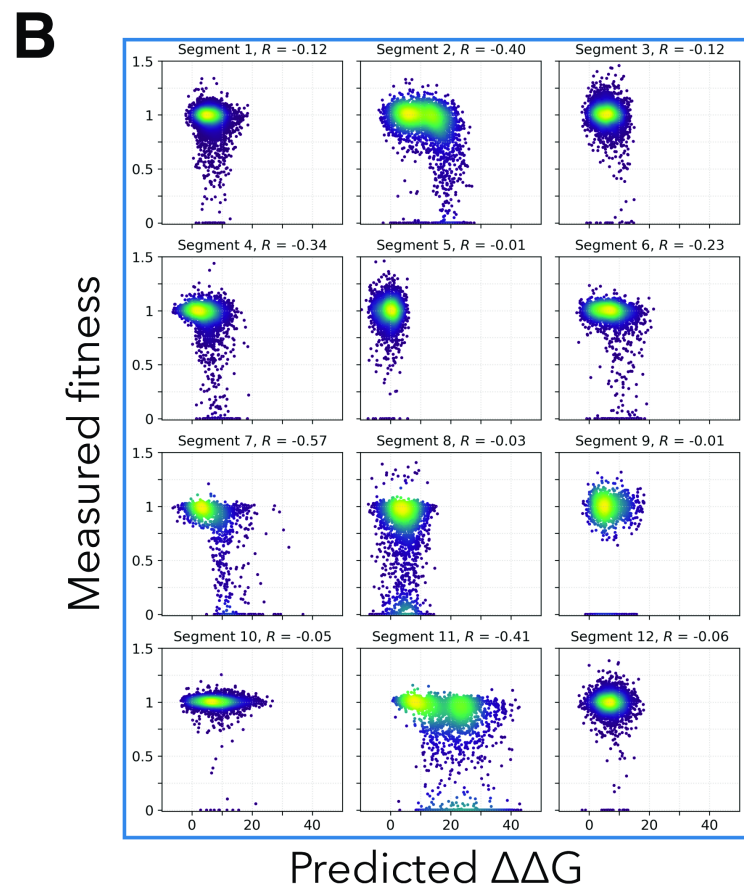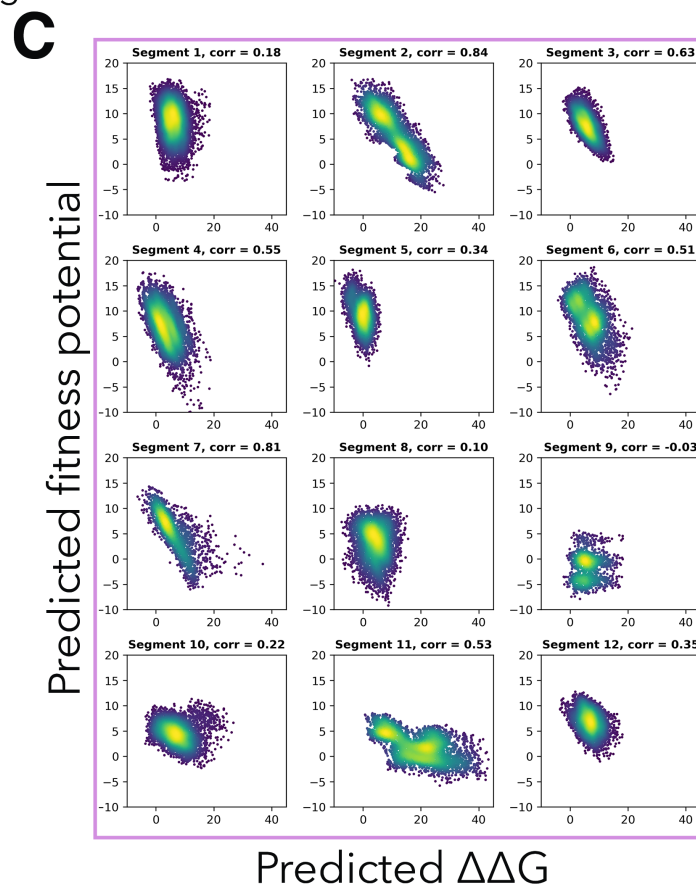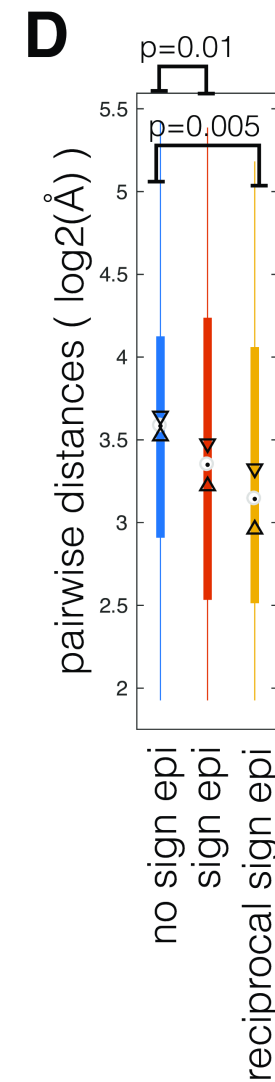

**A**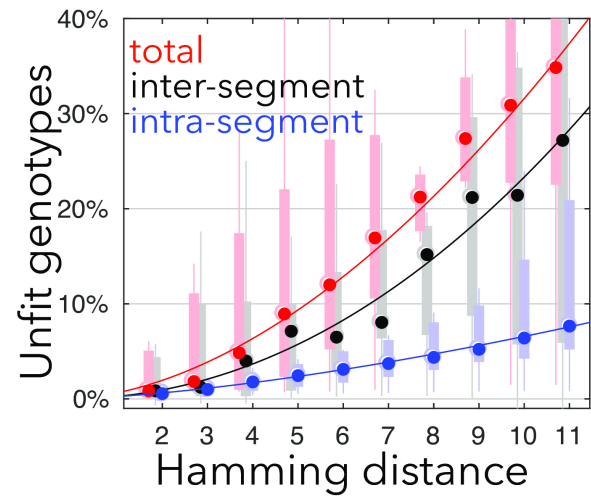**B**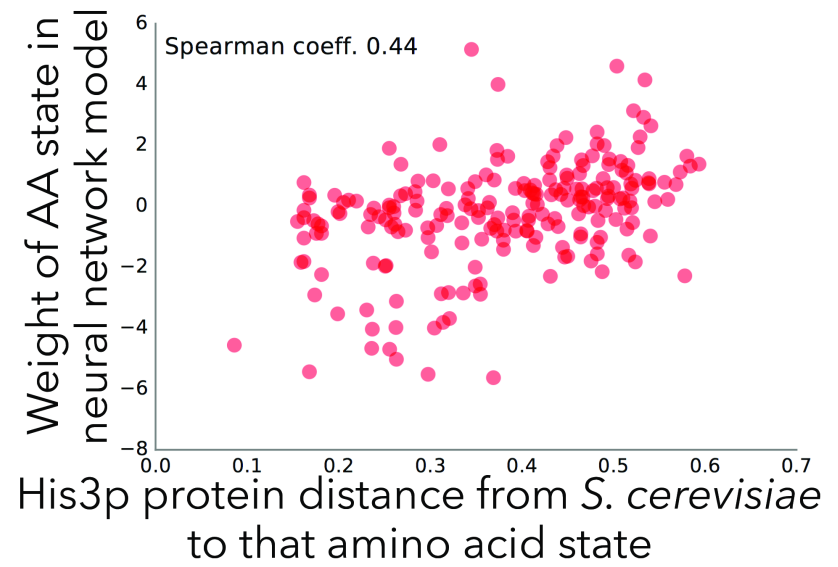

Source: https://www.biorxiv.org/content/10.1101/222778v2.full.pdf
